# Supplementary material for: Opportunistic Assessment of Ischemic Heart Disease Risk Using Abdominopelvic Computed Tomography and Medical Record Data: a Multimodal Explainable Artificial Intelligence Approach
Source: bioRxiv or medRxiv preprint supplement (doi:10.1101/2021.01.23.21250197), 2021-01-26
Supplement: Supplementary file [file media-2.pdf]

| <b>Variable</b> | <b>Category</b> | <b>Name</b>                                                       | <b>Description</b>                                                                                     |
|-----------------|-----------------|-------------------------------------------------------------------|--------------------------------------------------------------------------------------------------------|
| A01             | ATC             | Stomatological Preparations                                       | Number of prescriptions that match Anatomical Therapeutic Chemical code classification, 2nd level: A01 |
| A02             | ATC             | Drugs For Acid Related Disorders                                  | Number of prescriptions that match Anatomical Therapeutic Chemical code classification, 2nd level: A02 |
| A03             | ATC             | Drugs For Functional Gastrointestinal Disorders                   | Number of prescriptions that match Anatomical Therapeutic Chemical code classification, 2nd level: A03 |
| A04             | ATC             | Antiemetics And Antinauseants                                     | Number of prescriptions that match Anatomical Therapeutic Chemical code classification, 2nd level: A04 |
| A05             | ATC             | Bile And Liver Therapy Drugs                                      | Number of prescriptions that match Anatomical Therapeutic Chemical code classification, 2nd level: A05 |
| A06             | ATC             | Drugs For Constipation                                            | Number of prescriptions that match Anatomical Therapeutic Chemical code classification, 2nd level: A06 |
| A07             | ATC             | Antidiarrheals, Intestinal Antiinflammatory/Antiinfec tive Agents | Number of prescriptions that match Anatomical Therapeutic Chemical code classification, 2nd level: A07 |
| A08             | ATC             | Antiobesity Preparations, Excl. Diet Products                     | Number of prescriptions that match Anatomical Therapeutic Chemical code classification, 2nd level: A08 |
| A09             | ATC             | Digestives, Incl. Enzymes                                         | Number of prescriptions that match Anatomical Therapeutic Chemical code classification, 2nd level: A09 |
| A10             | ATC             | Drugs Used In Diabetes                                            | Number of prescriptions that match Anatomical Therapeutic Chemical code classification, 2nd level: A10 |
| A11             | ATC             | Vitamins                                                          | Number of prescriptions that match Anatomical Therapeutic Chemical code classification, 2nd level: A11 |

|     |     |                                                       |                                                                                                        |
|-----|-----|-------------------------------------------------------|--------------------------------------------------------------------------------------------------------|
| A12 | ATC | Mineral Supplements                                   | Number of prescriptions that match Anatomical Therapeutic Chemical code classification, 2nd level: A12 |
| A14 | ATC | Anabolic Agents For Systemic Use                      | Number of prescriptions that match Anatomical Therapeutic Chemical code classification, 2nd level: A14 |
| A16 | ATC | Other Alimentary Tract And Metabolism Products In Atc | Number of prescriptions that match Anatomical Therapeutic Chemical code classification, 2nd level: A16 |
| B01 | ATC | Antithrombotic Agents                                 | Number of prescriptions that match Anatomical Therapeutic Chemical code classification, 2nd level: B01 |
| B02 | ATC | Antihemorrhagics                                      | Number of prescriptions that match Anatomical Therapeutic Chemical code classification, 2nd level: B02 |
| B03 | ATC | Antianemic Preparations                               | Number of prescriptions that match Anatomical Therapeutic Chemical code classification, 2nd level: B03 |
| B05 | ATC | Blood Substitutes And Perfusion Solutions             | Number of prescriptions that match Anatomical Therapeutic Chemical code classification, 2nd level: B05 |
| B06 | ATC | Other Hematological Agents In Atc                     | Number of prescriptions that match Anatomical Therapeutic Chemical code classification, 2nd level: B06 |
| C01 | ATC | Cardiac Therapy Drugs                                 | Number of prescriptions that match Anatomical Therapeutic Chemical code classification, 2nd level: C01 |
| C02 | ATC | Antihypertensives                                     | Number of prescriptions that match Anatomical Therapeutic Chemical code classification, 2nd level: C02 |
| C03 | ATC | Diuretics                                             | Number of prescriptions that match Anatomical Therapeutic Chemical code classification, 2nd level: C03 |
| C04 | ATC | Peripheral Vasodilators                               | Number of prescriptions that match Anatomical Therapeutic Chemical code classification, 2nd level: C04 |

|     |     |                                                          |                                                                                                        |
|-----|-----|----------------------------------------------------------|--------------------------------------------------------------------------------------------------------|
| C05 | ATC | Vasoprotectives                                          | Number of prescriptions that match Anatomical Therapeutic Chemical code classification, 2nd level: C05 |
| C07 | ATC | Beta-Adrenergic Blocking Agents                          | Number of prescriptions that match Anatomical Therapeutic Chemical code classification, 2nd level: C07 |
| C08 | ATC | Calcium Channel Blockers                                 | Number of prescriptions that match Anatomical Therapeutic Chemical code classification, 2nd level: C08 |
| C09 | ATC | Agents Acting On The Renin-Angiotensin System            | Number of prescriptions that match Anatomical Therapeutic Chemical code classification, 2nd level: C09 |
| C10 | ATC | Lipid Modifying Agents                                   | Number of prescriptions that match Anatomical Therapeutic Chemical code classification, 2nd level: C10 |
| D01 | ATC | Antifungals For Dermatological Use                       | Number of prescriptions that match Anatomical Therapeutic Chemical code classification, 2nd level: D01 |
| D02 | ATC | Emollients And Protectives                               | Number of prescriptions that match Anatomical Therapeutic Chemical code classification, 2nd level: D02 |
| D03 | ATC | Preparations For Treatment Of Wounds And Ulcers          | Number of prescriptions that match Anatomical Therapeutic Chemical code classification, 2nd level: D03 |
| D04 | ATC | Antipruritics, Incl. Antihistamines, Anesthetics, Etc.   | Number of prescriptions that match Anatomical Therapeutic Chemical code classification, 2nd level: D04 |
| D05 | ATC | Antipsoriatics                                           | Number of prescriptions that match Anatomical Therapeutic Chemical code classification, 2nd level: D05 |
| D06 | ATC | Antibiotics And Chemotherapeutics For Dermatological Use | Number of prescriptions that match Anatomical Therapeutic Chemical code classification, 2nd level: D06 |
| D07 | ATC | Corticosteroids, Dermatological Preparations             | Number of prescriptions that match Anatomical Therapeutic Chemical code classification, 2nd level: D07 |

|     |     |                                                   |                                                                                                        |
|-----|-----|---------------------------------------------------|--------------------------------------------------------------------------------------------------------|
| D08 | ATC | Antiseptics And Disinfectants                     | Number of prescriptions that match Anatomical Therapeutic Chemical code classification, 2nd level: D08 |
| D09 | ATC | Medicated Dressings                               | Number of prescriptions that match Anatomical Therapeutic Chemical code classification, 2nd level: D09 |
| D10 | ATC | Anti-Acne Preparations                            | Number of prescriptions that match Anatomical Therapeutic Chemical code classification, 2nd level: D10 |
| D11 | ATC | Other Dermatological Preparations In Atc          | Number of prescriptions that match Anatomical Therapeutic Chemical code classification, 2nd level: D11 |
| G01 | ATC | Gynecological Antiinfectives And Antiseptics      | Number of prescriptions that match Anatomical Therapeutic Chemical code classification, 2nd level: G01 |
| G02 | ATC | Other Gynecologicals In Atc                       | Number of prescriptions that match Anatomical Therapeutic Chemical code classification, 2nd level: G02 |
| G03 | ATC | Sex Hormones And Modulators Of The Genital System | Number of prescriptions that match Anatomical Therapeutic Chemical code classification, 2nd level: G03 |
| G04 | ATC | Urologicals                                       | Number of prescriptions that match Anatomical Therapeutic Chemical code classification, 2nd level: G04 |
| H01 | ATC | Pituitary And Hypothalamic Hormones And Analogues | Number of prescriptions that match Anatomical Therapeutic Chemical code classification, 2nd level: H01 |
| H02 | ATC | Corticosteroids For Systemic Use                  | Number of prescriptions that match Anatomical Therapeutic Chemical code classification, 2nd level: H02 |
| H03 | ATC | Thyroid Therapy Drugs                             | Number of prescriptions that match Anatomical Therapeutic Chemical code classification, 2nd level: H03 |
| H04 | ATC | Pancreatic Hormones                               | Number of prescriptions that match Anatomical Therapeutic Chemical code classification, 2nd level: H04 |

|     |     |                                                              |                                                                                                        |
|-----|-----|--------------------------------------------------------------|--------------------------------------------------------------------------------------------------------|
| H05 | ATC | Calcium Homeostasis                                          | Number of prescriptions that match Anatomical Therapeutic Chemical code classification, 2nd level: H05 |
| J01 | ATC | Antibacterials For Systemic Use                              | Number of prescriptions that match Anatomical Therapeutic Chemical code classification, 2nd level: J01 |
| J02 | ATC | Antimycotics For Systemic Use                                | Number of prescriptions that match Anatomical Therapeutic Chemical code classification, 2nd level: J02 |
| J04 | ATC | Antimycobacterials                                           | Number of prescriptions that match Anatomical Therapeutic Chemical code classification, 2nd level: J04 |
| J05 | ATC | Antivirals For Systemic Use                                  | Number of prescriptions that match Anatomical Therapeutic Chemical code classification, 2nd level: J05 |
| J06 | ATC | Immune Sera And Immunoglobulins                              | Number of prescriptions that match Anatomical Therapeutic Chemical code classification, 2nd level: J06 |
| J07 | ATC | Vaccines                                                     | Number of prescriptions that match Anatomical Therapeutic Chemical code classification, 2nd level: J07 |
| L01 | ATC | Antineoplastic Agents                                        | Number of prescriptions that match Anatomical Therapeutic Chemical code classification, 2nd level: L01 |
| L02 | ATC | Endocrine Therapy Antineoplastic And Immunomodulating Agents | Number of prescriptions that match Anatomical Therapeutic Chemical code classification, 2nd level: L02 |
| L03 | ATC | Immunostimulants                                             | Number of prescriptions that match Anatomical Therapeutic Chemical code classification, 2nd level: L03 |
| L04 | ATC | Immunosuppressants                                           | Number of prescriptions that match Anatomical Therapeutic Chemical code classification, 2nd level: L04 |
| M01 | ATC | Antiinflammatory And Antirheumatic Products                  | Number of prescriptions that match Anatomical Therapeutic Chemical code classification, 2nd level: M01 |

|     |     |                                                                 |                                                                                                        |
|-----|-----|-----------------------------------------------------------------|--------------------------------------------------------------------------------------------------------|
| M02 | ATC | Topical Products For Joint And Muscular Pain                    | Number of prescriptions that match Anatomical Therapeutic Chemical code classification, 2nd level: M02 |
| M03 | ATC | Muscle Relaxants                                                | Number of prescriptions that match Anatomical Therapeutic Chemical code classification, 2nd level: M03 |
| M04 | ATC | Antigout Preparations                                           | Number of prescriptions that match Anatomical Therapeutic Chemical code classification, 2nd level: M04 |
| M05 | ATC | Drugs For Treatment Of Bone Diseases                            | Number of prescriptions that match Anatomical Therapeutic Chemical code classification, 2nd level: M05 |
| M09 | ATC | Other Drugs For Disorders Of The Musculo-Skeletal System In Atc | Number of prescriptions that match Anatomical Therapeutic Chemical code classification, 2nd level: M09 |
| N01 | ATC | Anesthetics                                                     | Number of prescriptions that match Anatomical Therapeutic Chemical code classification, 2nd level: N01 |
| N02 | ATC | Analgesics                                                      | Number of prescriptions that match Anatomical Therapeutic Chemical code classification, 2nd level: N02 |
| N03 | ATC | Antiepileptics                                                  | Number of prescriptions that match Anatomical Therapeutic Chemical code classification, 2nd level: N03 |
| N04 | ATC | Anti-Parkinson Drugs                                            | Number of prescriptions that match Anatomical Therapeutic Chemical code classification, 2nd level: N04 |
| N05 | ATC | Psycholeptics                                                   | Number of prescriptions that match Anatomical Therapeutic Chemical code classification, 2nd level: N05 |
| N06 | ATC | Psychoanaleptics                                                | Number of prescriptions that match Anatomical Therapeutic Chemical code classification, 2nd level: N06 |
| N07 | ATC | Other Nervous System Drugs In Atc                               | Number of prescriptions that match Anatomical Therapeutic Chemical code classification, 2nd level: N07 |

|     |     |                                                                  |                                                                                                        |
|-----|-----|------------------------------------------------------------------|--------------------------------------------------------------------------------------------------------|
| P01 | ATC | Antiprotozoals                                                   | Number of prescriptions that match Anatomical Therapeutic Chemical code classification, 2nd level: P01 |
| P02 | ATC | Anthelmintics                                                    | Number of prescriptions that match Anatomical Therapeutic Chemical code classification, 2nd level: P02 |
| P03 | ATC | Ectoparasiticides, Incl. Scabicides, Insecticides And Repellents | Number of prescriptions that match Anatomical Therapeutic Chemical code classification, 2nd level: P03 |
| R01 | ATC | Nasal Preparations                                               | Number of prescriptions that match Anatomical Therapeutic Chemical code classification, 2nd level: R01 |
| R02 | ATC | Throat Preparations                                              | Number of prescriptions that match Anatomical Therapeutic Chemical code classification, 2nd level: R02 |
| R03 | ATC | Drugs For Obstructive Airway Diseases                            | Number of prescriptions that match Anatomical Therapeutic Chemical code classification, 2nd level: R03 |
| R05 | ATC | Cough And Cold Preparations                                      | Number of prescriptions that match Anatomical Therapeutic Chemical code classification, 2nd level: R05 |
| R06 | ATC | Antihistamines For Systemic Use                                  | Number of prescriptions that match Anatomical Therapeutic Chemical code classification, 2nd level: R06 |
| R07 | ATC | Other Respiratory System Products In Atc                         | Number of prescriptions that match Anatomical Therapeutic Chemical code classification, 2nd level: R07 |
| S01 | ATC | Ophthalmologicals                                                | Number of prescriptions that match Anatomical Therapeutic Chemical code classification, 2nd level: S01 |
| S02 | ATC | Otologicals                                                      | Number of prescriptions that match Anatomical Therapeutic Chemical code classification, 2nd level: S02 |
| S03 | ATC | Ophthalmological And Otological Preparations                     | Number of prescriptions that match Anatomical Therapeutic Chemical code classification, 2nd level: S03 |

|               |     |                                                          |                                                                                                                                                               |
|---------------|-----|----------------------------------------------------------|---------------------------------------------------------------------------------------------------------------------------------------------------------------|
| V03           | ATC | All Other Therapeutic Products                           | Number of prescriptions that match Anatomical Therapeutic Chemical code classification, 2nd level: V03                                                        |
| V04           | ATC | Diagnostic Agents                                        | Number of prescriptions that match Anatomical Therapeutic Chemical code classification, 2nd level: V04                                                        |
| V06           | ATC | General Nutrients                                        | Number of prescriptions that match Anatomical Therapeutic Chemical code classification, 2nd level: V06                                                        |
| Anesthesia_1  | CPT | Anesthesia for Procedures on the Head                    | Number of times a Current Procedural Terminology code was documented in the group: Anesthesia for Procedures on the Head (CPT 100 - 222)                      |
| Anesthesia_10 | CPT | Anesthesia for Procedures on the Upper Leg (Except Knee) | Number of times a Current Procedural Terminology code was documented in the group: Anesthesia for Procedures on the Upper Leg (Except Knee) (CPT 1200 - 1274) |
| Anesthesia_11 | CPT | Anesthesia for Procedures on the Knee and Popliteal Area | Number of times a Current Procedural Terminology code was documented in the group: Anesthesia for Procedures on the Knee and Popliteal Area (CPT 1320 - 1444) |
| Anesthesia_12 | CPT | Anesthesia for Procedures on the Lower Leg (Below Knee)  | Number of times a Current Procedural Terminology code was documented in the group: Anesthesia for Procedures on the Lower Leg (Below Knee) (CPT 1462 - 1522)  |
| Anesthesia_13 | CPT | Anesthesia for Procedures on the Shoulder and Axilla     | Number of times a Current Procedural Terminology code was documented in the group: Anesthesia for Procedures on the Shoulder and Axilla (CPT 1610 - 1680)     |



|               |     |                                                                          |                                                                                                                                                                             |
|---------------|-----|--------------------------------------------------------------------------|-----------------------------------------------------------------------------------------------------------------------------------------------------------------------------|
| Anesthesia_14 | CPT | Anesthesia for Procedures on the Upper Arm and Elbow                     | Number of times a Current Procedural Terminology code was documented in the group: Anesthesia for Procedures on the Upper Arm and Elbow (CPT 1710 - 1782)                   |
| Anesthesia_15 | CPT | Anesthesia for Procedures on the Forearm, Wrist, and Hand                | Number of times a Current Procedural Terminology code was documented in the group: Anesthesia for Procedures on the Forearm, Wrist, and Hand (CPT 1810 - 1860)              |
| Anesthesia_16 | CPT | Anesthesia for Radiological Procedures                                   | Number of times a Current Procedural Terminology code was documented in the group: Anesthesia for Radiological Procedures (CPT 1916 - 1936)                                 |
| Anesthesia_18 | CPT | Anesthesia for Obstetric Procedures                                      | Number of times a Current Procedural Terminology code was documented in the group: Anesthesia for Obstetric Procedures (CPT 1958 - 1969)                                    |
| Anesthesia_19 | CPT | Anesthesia for Other Procedures                                          | Number of times a Current Procedural Terminology code was documented in the group: Anesthesia for Other Procedures (CPT 1990 - 1999)                                        |
| Anesthesia_2  | CPT | Anesthesia for Procedures on the Neck                                    | Number of times a Current Procedural Terminology code was documented in the group: Anesthesia for Procedures on the Neck (CPT 300 - 352)                                    |
| Anesthesia_3  | CPT | Anesthesia for Procedures on the Thorax (Chest Wall and Shoulder Girdle) | Number of times a Current Procedural Terminology code was documented in the group: Anesthesia for Procedures on the Thorax (Chest Wall and Shoulder Girdle) (CPT 400 - 474) |

|                   |     |                                                              |                                                                                                                                                                          |
|-------------------|-----|--------------------------------------------------------------|--------------------------------------------------------------------------------------------------------------------------------------------------------------------------|
| Anesthesia_<br>4  | CPT | Anesthesia for<br>Intrathoracic Procedures                   | Number of times a Current<br>Procedural Terminology code<br>was documented in the group:<br>Anesthesia for Intrathoracic<br>Procedures (CPT 500 - 580)                   |
| Anesthesia_<br>5  | CPT | Anesthesia for<br>Procedures on the Spine<br>and Spinal Cord | Number of times a Current<br>Procedural Terminology code<br>was documented in the group:<br>Anesthesia for Procedures on<br>the Spine and Spinal Cord<br>(CPT 600 - 670) |
| Anesthesia_<br>6  | CPT | Anesthesia for<br>Procedures on the Upper<br>Abdomen         | Number of times a Current<br>Procedural Terminology code<br>was documented in the group:<br>Anesthesia for Procedures on<br>the Upper Abdomen (CPT<br>700 - 797)         |
| Anesthesia_<br>7  | CPT | Anesthesia for<br>Procedures on the Lower<br>Abdomen         | Number of times a Current<br>Procedural Terminology code<br>was documented in the group:<br>Anesthesia for Procedures on<br>the Lower Abdomen (CPT<br>800 - 882)         |
| Anesthesia_<br>8  | CPT | Anesthesia for<br>Procedures on the<br>Perineum              | Number of times a Current<br>Procedural Terminology code<br>was documented in the group:<br>Anesthesia for Procedures on<br>the Perineum (CPT 902 - 952)                 |
| Anesthesia_<br>9  | CPT | Anesthesia for<br>Procedures on the Pelvis<br>(Except Hip)   | Number of times a Current<br>Procedural Terminology code<br>was documented in the group:<br>Anesthesia for Procedures on<br>the Pelvis (Except Hip) (CPT<br>1112 - 1173) |
| Evaluation_<br>1  | CPT | Office or Other Outpatient<br>Services                       | Number of times a Current<br>Procedural Terminology code<br>was documented in the group:<br>Office or Other Outpatient<br>Services (CPT 99201 -<br>99215)                |
| Evaluation_<br>11 | CPT | Prolonged Services                                           | Number of times a Current<br>Procedural Terminology code<br>was documented in the group:<br>Prolonged Services (CPT<br>99354 - 99416)                                    |

|                   |     |                                                                                              |                                                                                                                                                                                                     |
|-------------------|-----|----------------------------------------------------------------------------------------------|-----------------------------------------------------------------------------------------------------------------------------------------------------------------------------------------------------|
| Evaluation_<br>12 | CPT | Case Management Services                                                                     | Number of times a Current Procedural Terminology code was documented in the group: Case Management Services (CPT 99366 - 99368)                                                                     |
| Evaluation_<br>13 | CPT | Care Plan Oversight Services                                                                 | Number of times a Current Procedural Terminology code was documented in the group: Care Plan Oversight Services (CPT 99374 - 99380)                                                                 |
| Evaluation_<br>14 | CPT | Preventive Medicine Services                                                                 | Number of times a Current Procedural Terminology code was documented in the group: Preventive Medicine Services (CPT 99381 - 99429)                                                                 |
| Evaluation_<br>15 | CPT | Non-Face-to-Face Evaluation and Management Services                                          | Number of times a Current Procedural Terminology code was documented in the group: Non-Face-to-Face Evaluation and Management Services (CPT 99441 - 99458)                                          |
| Evaluation_<br>19 | CPT | Inpatient Neonatal Intensive Care Services and Pediatric and Neonatal Critical Care Services | Number of times a Current Procedural Terminology code was documented in the group: Inpatient Neonatal Intensive Care Services and Pediatric and Neonatal Critical Care Services (CPT 99466 - 99486) |
| Evaluation_<br>2  | CPT | Hospital Observation Services                                                                | Number of times a Current Procedural Terminology code was documented in the group: Hospital Observation Services (CPT 99217 - 99226)                                                                |
| Evaluation_<br>22 | CPT | Care Management Evaluation and Management Services                                           | Number of times a Current Procedural Terminology code was documented in the group: Care Management Evaluation and Management Services (CPT 99487 - 99491)                                           |

|                   |     |                                                                              |                                                                                                                                                                                                 |
|-------------------|-----|------------------------------------------------------------------------------|-------------------------------------------------------------------------------------------------------------------------------------------------------------------------------------------------|
| Evaluation_<br>24 | CPT | Transitional Care<br>Evaluation and<br>Management Services                   | Number of times a Current<br>Procedural Terminology code<br>was documented in the group:<br>Transitional Care Evaluation<br>and Management Services<br>(CPT 99495 - 99496)                      |
| Evaluation_<br>26 | CPT | Other Evaluation and<br>Management Services                                  | Number of times a Current<br>Procedural Terminology code<br>was documented in the group:<br>Other Evaluation and<br>Management Services (CPT<br>99499 - 99499)                                  |
| Evaluation_<br>3  | CPT | Hospital Inpatient<br>Services                                               | Number of times a Current<br>Procedural Terminology code<br>was documented in the group:<br>Hospital Inpatient Services<br>(CPT 99221 - 99239)                                                  |
| Evaluation_<br>4  | CPT | Consultation Services                                                        | Number of times a Current<br>Procedural Terminology code<br>was documented in the group:<br>Consultation Services (CPT<br>99241 - 99255)                                                        |
| Evaluation_<br>5  | CPT | Emergency Department<br>Services                                             | Number of times a Current<br>Procedural Terminology code<br>was documented in the group:<br>Emergency Department<br>Services (CPT 99281 -<br>99288)                                             |
| Evaluation_<br>6  | CPT | Critical Care Services                                                       | Number of times a Current<br>Procedural Terminology code<br>was documented in the group:<br>Critical Care Services (CPT<br>99291 - 99292)                                                       |
| Evaluation_<br>7  | CPT | Nursing Facility Services                                                    | Number of times a Current<br>Procedural Terminology code<br>was documented in the group:<br>Nursing Facility Services<br>(CPT 99304 - 99318)                                                    |
| Evaluation_<br>8  | CPT | Domiciliary, Rest Home<br>(eg, Boarding Home), or<br>Custodial Care Services | Number of times a Current<br>Procedural Terminology code<br>was documented in the group:<br>Domiciliary, Rest Home (eg,<br>Boarding Home), or Custodial<br>Care Services (CPT 99324 -<br>99337) |

|            |     |                                                  |                                                                                                                                                         |
|------------|-----|--------------------------------------------------|---------------------------------------------------------------------------------------------------------------------------------------------------------|
| Medical_10 | CPT | Cardiovascular Procedures                        | Number of times a Current Procedural Terminology code was documented in the group: Cardiovascular Procedures (CPT 92920 - 93799)                        |
| Medical_11 | CPT | Non-Invasive Vascular Diagnostic Studies         | Number of times a Current Procedural Terminology code was documented in the group: Non-Invasive Vascular Diagnostic Studies (CPT 93880 - 93998)         |
| Medical_12 | CPT | Pulmonary Procedures                             | Number of times a Current Procedural Terminology code was documented in the group: Pulmonary Procedures (CPT 94002 - 94799)                             |
| Medical_13 | CPT | Allergy and Clinical Immunology Procedures       | Number of times a Current Procedural Terminology code was documented in the group: Allergy and Clinical Immunology Procedures (CPT 95004 - 95199)       |
| Medical_14 | CPT | Endocrinology Services                           | Number of times a Current Procedural Terminology code was documented in the group: Endocrinology Services (CPT 95249 - 95251)                           |
| Medical_15 | CPT | Neurology and Neuromuscular Procedures           | Number of times a Current Procedural Terminology code was documented in the group: Neurology and Neuromuscular Procedures (CPT 95700 - 96020)           |
| Medical_16 | CPT | Medical Genetics and Genetic Counseling Services | Number of times a Current Procedural Terminology code was documented in the group: Medical Genetics and Genetic Counseling Services (CPT 96040 - 96040) |

|            |     |                                                                                                                                                                           |                                                                                                                                                                                                                                                                                  |
|------------|-----|---------------------------------------------------------------------------------------------------------------------------------------------------------------------------|----------------------------------------------------------------------------------------------------------------------------------------------------------------------------------------------------------------------------------------------------------------------------------|
| Medical_17 | CPT | Central Nervous System Assessments/Tests (eg, Neuro-Cognitive, Mental Status, Speech Testing)                                                                             | Number of times a Current Procedural Terminology code was documented in the group: Central Nervous System Assessments/Tests (eg, Neuro-Cognitive, Mental Status, Speech Testing) (CPT 96105 - 96146)                                                                             |
| Medical_19 | CPT | Hydration, Therapeutic, Prophylactic, Diagnostic Injections and Infusions, and Chemotherapy and Other Highly Complex Drug or Highly Complex Biologic Agent Administration | Number of times a Current Procedural Terminology code was documented in the group: Hydration, Therapeutic, Prophylactic, Diagnostic Injections and Infusions, and Chemotherapy and Other Highly Complex Drug or Highly Complex Biologic Agent Administration (CPT 96360 - 96549) |
| Medical_2  | CPT | Immunization Administration for Vaccines/Toxoids                                                                                                                          | Number of times a Current Procedural Terminology code was documented in the group: Immunization Administration for Vaccines/Toxoids (CPT 90460 - 90474)                                                                                                                          |
| Medical_20 | CPT | Photodynamic Therapy Procedures                                                                                                                                           | Number of times a Current Procedural Terminology code was documented in the group: Photodynamic Therapy Procedures (CPT 96567 - 96574)                                                                                                                                           |
| Medical_21 | CPT | Special Dermatological Procedures                                                                                                                                         | Number of times a Current Procedural Terminology code was documented in the group: Special Dermatological Procedures (CPT 96900 - 96999)                                                                                                                                         |
| Medical_23 | CPT | Physical Medicine and Rehabilitation Evaluations                                                                                                                          | Number of times a Current Procedural Terminology code was documented in the group: Physical Medicine and Rehabilitation Evaluations (CPT 97161 - 97799)                                                                                                                          |

|            |     |                                                    |                                                                                                                                                           |
|------------|-----|----------------------------------------------------|-----------------------------------------------------------------------------------------------------------------------------------------------------------|
| Medical_24 | CPT | Medical Nutrition Therapy Procedures               | Number of times a Current Procedural Terminology code was documented in the group: Medical Nutrition Therapy Procedures (CPT 97802 - 97804)               |
| Medical_25 | CPT | Acupuncture Procedures                             | Number of times a Current Procedural Terminology code was documented in the group: Acupuncture Procedures (CPT 97810 - 97814)                             |
| Medical_27 | CPT | Chiropractic Manipulative Treatment Procedures     | Number of times a Current Procedural Terminology code was documented in the group: Chiropractic Manipulative Treatment Procedures (CPT 98940 - 98943)     |
| Medical_28 | CPT | Education and Training for Patient Self-Management | Number of times a Current Procedural Terminology code was documented in the group: Education and Training for Patient Self-Management (CPT 98960 - 98962) |
| Medical_29 | CPT | Non-Face-to-Face Nonphysician Services             | Number of times a Current Procedural Terminology code was documented in the group: Non-Face-to-Face Nonphysician Services (CPT 98966 - 98972)             |
| Medical_3  | CPT | Vaccines, Toxoids                                  | Number of times a Current Procedural Terminology code was documented in the group: Vaccines, Toxoids (CPT 90476 - 90756)                                  |
| Medical_30 | CPT | Special Services, Procedures and Reports           | Number of times a Current Procedural Terminology code was documented in the group: Special Services, Procedures and Reports (CPT 99000 - 99091)           |

|            |     |                                         |                                                                                                                                                |
|------------|-----|-----------------------------------------|------------------------------------------------------------------------------------------------------------------------------------------------|
| Medical_31 | CPT | Qualifying Circumstances for Anesthesia | Number of times a Current Procedural Terminology code was documented in the group: Qualifying Circumstances for Anesthesia (CPT 99100 - 99140) |
| Medical_32 | CPT | Moderate (Conscious) Sedation           | Number of times a Current Procedural Terminology code was documented in the group: Moderate (Conscious) Sedation (CPT 99151 - 99157)           |
| Medical_33 | CPT | Other Medicine Services and Procedures  | Number of times a Current Procedural Terminology code was documented in the group: Other Medicine Services and Procedures (CPT 99170 - 99199)  |
| Medical_4  | CPT | Psychiatry Services and Procedures      | Number of times a Current Procedural Terminology code was documented in the group: Psychiatry Services and Procedures (CPT 90785 - 90899)      |
| Medical_5  | CPT | Biofeedback Services and Procedures     | Number of times a Current Procedural Terminology code was documented in the group: Biofeedback Services and Procedures (CPT 90901 - 90913)     |
| Medical_6  | CPT | Dialysis Services and Procedures        | Number of times a Current Procedural Terminology code was documented in the group: Dialysis Services and Procedures (CPT 90935 - 90999)        |
| Medical_7  | CPT | Gastroenterology Procedures             | Number of times a Current Procedural Terminology code was documented in the group: Gastroenterology Procedures (CPT 91010 - 91299)             |



|                  |     |                                                                       |                                                                                                                                                                              |
|------------------|-----|-----------------------------------------------------------------------|------------------------------------------------------------------------------------------------------------------------------------------------------------------------------|
| Medical_8        | CPT | Ophthalmology Services and Procedures                                 | Number of times a Current Procedural Terminology code was documented in the group: Ophthalmology Services and Procedures (CPT 92002 - 92499)                                 |
| Medical_9        | CPT | Special Otorhinolaryngologic Services and Procedures                  | Number of times a Current Procedural Terminology code was documented in the group: Special Otorhinolaryngologic Services and Procedures (CPT 92502 - 92700)                  |
| Pathology_1<br>0 | CPT | Drug Assay Procedures                                                 | Number of times a Current Procedural Terminology code was documented in the group: Drug Assay Procedures (CPT 80305 - 80377)                                                 |
| Pathology_1<br>2 | CPT | Clinical Pathology Consultations                                      | Number of times a Current Procedural Terminology code was documented in the group: Clinical Pathology Consultations (CPT 80500 - 80502)                                      |
| Pathology_1<br>3 | CPT | Urinalysis Procedures                                                 | Number of times a Current Procedural Terminology code was documented in the group: Urinalysis Procedures (CPT 81000 - 81099)                                                 |
| Pathology_1<br>4 | CPT | Molecular Pathology Procedures                                        | Number of times a Current Procedural Terminology code was documented in the group: Molecular Pathology Procedures (CPT 81105 - 81408)                                        |
| Pathology_1<br>5 | CPT | Genomic Sequencing Procedures and Other Molecular Multianalyte Assays | Number of times a Current Procedural Terminology code was documented in the group: Genomic Sequencing Procedures and Other Molecular Multianalyte Assays (CPT 81410 - 81479) |

|                  |     |                                       |                                                                                                                                              |
|------------------|-----|---------------------------------------|----------------------------------------------------------------------------------------------------------------------------------------------|
| Pathology_1<br>7 | CPT | Chemistry Procedures                  | Number of times a Current Procedural Terminology code was documented in the group: Chemistry Procedures (CPT 82009 - 84999)                  |
| Pathology_1<br>8 | CPT | Hematology and Coagulation Procedures | Number of times a Current Procedural Terminology code was documented in the group: Hematology and Coagulation Procedures (CPT 85002 - 85999) |
| Pathology_1<br>9 | CPT | Immunology Procedures                 | Number of times a Current Procedural Terminology code was documented in the group: Immunology Procedures (CPT 86000 - 86849)                 |
| Pathology_2<br>0 | CPT | Transfusion Medicine Procedures       | Number of times a Current Procedural Terminology code was documented in the group: Transfusion Medicine Procedures (CPT 86850 - 86999)       |
| Pathology_2<br>1 | CPT | Microbiology Procedures               | Number of times a Current Procedural Terminology code was documented in the group: Microbiology Procedures (CPT 87003 - 87999)               |
| Pathology_2<br>3 | CPT | Cytopathology Procedures              | Number of times a Current Procedural Terminology code was documented in the group: Cytopathology Procedures (CPT 88104 - 88199)              |
| Pathology_2<br>4 | CPT | Cytogenetic Studies                   | Number of times a Current Procedural Terminology code was documented in the group: Cytogenetic Studies (CPT 88230 - 88299)                   |
| Pathology_2<br>5 | CPT | Surgical Pathology Procedures         | Number of times a Current Procedural Terminology code was documented in the group: Surgical Pathology Procedures (CPT 88300 - 88399)         |

|                  |     |                                                            |                                                                                                                                                                               |
|------------------|-----|------------------------------------------------------------|-------------------------------------------------------------------------------------------------------------------------------------------------------------------------------|
| Pathology_2<br>7 | CPT | Other Pathology and<br>Laboratory Procedures               | Number of times a Current<br>Procedural Terminology code<br>was documented in the group:<br>Other Pathology and<br>Laboratory Procedures (CPT<br>89049 - 89240)               |
| Pathology_2<br>8 | CPT | Reproductive Medicine<br>Procedures                        | Number of times a Current<br>Procedural Terminology code<br>was documented in the group:<br>Reproductive Medicine<br>Procedures (CPT 89250 -<br>89398)                        |
| Pathology_8      | CPT | Organ or Disease<br>Oriented Panels                        | Number of times a Current<br>Procedural Terminology code<br>was documented in the group:<br>Organ or Disease Oriented<br>Panels (CPT 80047 - 80081)                           |
| Pathology_9      | CPT | Therapeutic Drug Assays                                    | Number of times a Current<br>Procedural Terminology code<br>was documented in the group:<br>Therapeutic Drug Assays<br>(CPT 80145 - 80377)                                    |
| Radiology_1      | CPT | Diagnostic Radiology<br>(Diagnostic Imaging)<br>Procedures | Number of times a Current<br>Procedural Terminology code<br>was documented in the group:<br>Diagnostic Radiology<br>(Diagnostic Imaging)<br>Procedures (CPT 70010 -<br>76499) |
| Radiology_2      | CPT | Diagnostic Ultrasound<br>Procedures                        | Number of times a Current<br>Procedural Terminology code<br>was documented in the group:<br>Diagnostic Ultrasound<br>Procedures (CPT 76506 -<br>76999)                        |
| Radiology_3      | CPT | Radiologic Guidance                                        | Number of times a Current<br>Procedural Terminology code<br>was documented in the group:<br>Radiologic Guidance (CPT<br>77001 - 77022)                                        |
| Radiology_4      | CPT | Breast, Mammography                                        | Number of times a Current<br>Procedural Terminology code<br>was documented in the group:<br>Breast, Mammography (CPT<br>77046 - 77067)                                        |

|             |     |                                                  |                                                                                                                                                         |
|-------------|-----|--------------------------------------------------|---------------------------------------------------------------------------------------------------------------------------------------------------------|
| Radiology_5 | CPT | Bone/Joint Studies                               | Number of times a Current Procedural Terminology code was documented in the group: Bone/Joint Studies (CPT 77071 - 77086)                               |
| Radiology_6 | CPT | Radiation Oncology Treatment                     | Number of times a Current Procedural Terminology code was documented in the group: Radiation Oncology Treatment (CPT 77261 - 77799)                     |
| Radiology_7 | CPT | Nuclear Medicine Procedures                      | Number of times a Current Procedural Terminology code was documented in the group: Nuclear Medicine Procedures (CPT 78012 - 79999)                      |
| Surgery_1   | CPT | General Surgical Procedures                      | Number of times a Current Procedural Terminology code was documented in the group: General Surgical Procedures (CPT 10004 - 10021)                      |
| Surgery_10  | CPT | Surgical Procedures on the Male Genital System   | Number of times a Current Procedural Terminology code was documented in the group: Surgical Procedures on the Male Genital System (CPT 54000 - 55899)   |
| Surgery_11  | CPT | Reproductive System Procedures                   | Number of times a Current Procedural Terminology code was documented in the group: Reproductive System Procedures (CPT 55920 - 55920)                   |
| Surgery_13  | CPT | Surgical Procedures on the Female Genital System | Number of times a Current Procedural Terminology code was documented in the group: Surgical Procedures on the Female Genital System (CPT 56405 - 58999) |

|            |     |                                                     |                                                                                                                                                            |
|------------|-----|-----------------------------------------------------|------------------------------------------------------------------------------------------------------------------------------------------------------------|
| Surgery_14 | CPT | Surgical Procedures for Maternity Care and Delivery | Number of times a Current Procedural Terminology code was documented in the group: Surgical Procedures for Maternity Care and Delivery (CPT 59000 - 59899) |
| Surgery_15 | CPT | Surgical Procedures on the Endocrine System         | Number of times a Current Procedural Terminology code was documented in the group: Surgical Procedures on the Endocrine System (CPT 60000 - 60699)         |
| Surgery_16 | CPT | Surgical Procedures on the Nervous System           | Number of times a Current Procedural Terminology code was documented in the group: Surgical Procedures on the Nervous System (CPT 61000 - 64999)           |
| Surgery_17 | CPT | Surgical Procedures on the Eye and Ocular Adnexa    | Number of times a Current Procedural Terminology code was documented in the group: Surgical Procedures on the Eye and Ocular Adnexa (CPT 65091 - 68899)    |
| Surgery_18 | CPT | Surgical Procedures on the Auditory System          | Number of times a Current Procedural Terminology code was documented in the group: Surgical Procedures on the Auditory System (CPT 69000 - 69979)          |
| Surgery_19 | CPT | Operating Microscope Procedures                     | Number of times a Current Procedural Terminology code was documented in the group: Operating Microscope Procedures (CPT 69990 - 69990)                     |
| Surgery_2  | CPT | Surgical Procedures on the Integumentary System     | Number of times a Current Procedural Terminology code was documented in the group: Surgical Procedures on the Integumentary System (CPT 10030 - 19499)     |

|             |              |                                                        |                                                                                                                                                               |
|-------------|--------------|--------------------------------------------------------|---------------------------------------------------------------------------------------------------------------------------------------------------------------|
| Surgery_3   | CPT          | Surgical Procedures on the Musculoskeletal System      | Number of times a Current Procedural Terminology code was documented in the group: Surgical Procedures on the Musculoskeletal System (CPT 20100 - 29999)      |
| Surgery_4   | CPT          | Surgical Procedures on the Respiratory System          | Number of times a Current Procedural Terminology code was documented in the group: Surgical Procedures on the Respiratory System (CPT 30000 - 32999)          |
| Surgery_5   | CPT          | Surgical Procedures on the Cardiovascular System       | Number of times a Current Procedural Terminology code was documented in the group: Surgical Procedures on the Cardiovascular System (CPT 33016 - 37799)       |
| Surgery_6   | CPT          | Surgical Procedures on the Hemic and Lymphatic Systems | Number of times a Current Procedural Terminology code was documented in the group: Surgical Procedures on the Hemic and Lymphatic Systems (CPT 38100 - 38999) |
| Surgery_7   | CPT          | Surgical Procedures on the Mediastinum and Diaphragm   | Number of times a Current Procedural Terminology code was documented in the group: Surgical Procedures on the Mediastinum and Diaphragm (CPT 39000 - 39599)   |
| Surgery_8   | CPT          | Surgical Procedures on the Digestive System            | Number of times a Current Procedural Terminology code was documented in the group: Surgical Procedures on the Digestive System (CPT 40490 - 49999)            |
| Surgery_9   | CPT          | Surgical Procedures on the Urinary System              | Number of times a Current Procedural Terminology code was documented in the group: Surgical Procedures on the Urinary System (CPT 50010 - 53899)              |
| age_at_scan | Demographics | Age                                                    | Age at time of abdominal scan in years                                                                                                                        |

|               |              |                                                                    |                                                                                                                                                                                                                   |
|---------------|--------------|--------------------------------------------------------------------|-------------------------------------------------------------------------------------------------------------------------------------------------------------------------------------------------------------------|
| gender        | Demographics | Male                                                               | Whether the patient is male                                                                                                                                                                                       |
| Chapter_I_1   | ICD10        | Intestinal infectious diseases                                     | Number of times an International Classification of Diseases, 10th edition was documented in the year prior to imaging: Intestinal infectious diseases (ICD10 Codes A00 - A09)                                     |
| Chapter_I_1_1 | ICD10        | Viral infections characterized by skin and mucous membrane lesions | Number of times an International Classification of Diseases, 10th edition was documented in the year prior to imaging: Viral infections characterized by skin and mucous membrane lesions (ICD10 Codes B00 - B09) |
| Chapter_I_1_2 | ICD10        | Viral hepatitis                                                    | Number of times an International Classification of Diseases, 10th edition was documented in the year prior to imaging: Viral hepatitis (ICD10 Codes B15 - B19)                                                    |
| Chapter_I_1_3 | ICD10        | Human immunodeficiency virus [HIV] disease                         | Number of times an International Classification of Diseases, 10th edition was documented in the year prior to imaging: Human immunodeficiency virus [HIV] disease (ICD10 Codes B20 - B24)                         |
| Chapter_I_1_4 | ICD10        | Other viral diseases                                               | Number of times an International Classification of Diseases, 10th edition was documented in the year prior to imaging: Other viral diseases (ICD10 Codes B25 - B34)                                               |
| Chapter_I_1_5 | ICD10        | Mycoses                                                            | Number of times an International Classification of Diseases, 10th edition was documented in the year prior to imaging: Mycoses (ICD10 Codes B35 - B49)                                                            |

|                  |       |                                               |                                                                                                                                                                                              |
|------------------|-------|-----------------------------------------------|----------------------------------------------------------------------------------------------------------------------------------------------------------------------------------------------|
| Chapter_I_1<br>6 | ICD10 | Protozoal diseases                            | Number of times an International Classification of Diseases, 10th edition was documented in the year prior to imaging: Protozoal diseases (ICD10 Codes B50 - B64)                            |
| Chapter_I_1<br>7 | ICD10 | Helminthiases                                 | Number of times an International Classification of Diseases, 10th edition was documented in the year prior to imaging: Helminthiases (ICD10 Codes B65 - B83)                                 |
| Chapter_I_1<br>8 | ICD10 | Pediculosis, acariasis and other infestations | Number of times an International Classification of Diseases, 10th edition was documented in the year prior to imaging: Pediculosis, acariasis and other infestations (ICD10 Codes B85 - B89) |
| Chapter_I_1<br>9 | ICD10 | Sequelae of infectious and parasitic diseases | Number of times an International Classification of Diseases, 10th edition was documented in the year prior to imaging: Sequelae of infectious and parasitic diseases (ICD10 Codes B90 - B94) |
| Chapter_I_2      | ICD10 | Tuberculosis                                  | Number of times an International Classification of Diseases, 10th edition was documented in the year prior to imaging: Tuberculosis (ICD10 Codes A15 - A19)                                  |
| Chapter_I_2<br>0 | ICD10 | Bacterial, viral and other infectious agents  | Number of times an International Classification of Diseases, 10th edition was documented in the year prior to imaging: Bacterial, viral and other infectious agents (ICD10 Codes B95 - B98)  |



|                  |       |                                                             |                                                                                                                                                                                                            |
|------------------|-------|-------------------------------------------------------------|------------------------------------------------------------------------------------------------------------------------------------------------------------------------------------------------------------|
| Chapter_I_2<br>1 | ICD10 | Other infectious diseases                                   | Number of times an International Classification of Diseases, 10th edition was documented in the year prior to imaging: Other infectious diseases (ICD10 Codes B99 - B99)                                   |
| Chapter_I_3      | ICD10 | Certain zoonotic bacterial diseases                         | Number of times an International Classification of Diseases, 10th edition was documented in the year prior to imaging: Certain zoonotic bacterial diseases (ICD10 Codes A20 - A28)                         |
| Chapter_I_4      | ICD10 | Other bacterial diseases                                    | Number of times an International Classification of Diseases, 10th edition was documented in the year prior to imaging: Other bacterial diseases (ICD10 Codes A30 - A49)                                    |
| Chapter_I_5      | ICD10 | Infections with a predominantly sexual mode of transmission | Number of times an International Classification of Diseases, 10th edition was documented in the year prior to imaging: Infections with a predominantly sexual mode of transmission (ICD10 Codes A50 - A64) |
| Chapter_I_6      | ICD10 | Other spirochaetal diseases                                 | Number of times an International Classification of Diseases, 10th edition was documented in the year prior to imaging: Other spirochaetal diseases (ICD10 Codes A65 - A69)                                 |
| Chapter_I_7      | ICD10 | Other diseases caused by chlamydiae                         | Number of times an International Classification of Diseases, 10th edition was documented in the year prior to imaging: Other diseases caused by chlamydiae (ICD10 Codes A70 - A74)                         |

|               |       |                                                |                                                                                                                                                                                               |
|---------------|-------|------------------------------------------------|-----------------------------------------------------------------------------------------------------------------------------------------------------------------------------------------------|
| Chapter_I_8   | ICD10 | Rickettsioses                                  | Number of times an International Classification of Diseases, 10th edition was documented in the year prior to imaging: Rickettsioses (ICD10 Codes A75 - A79)                                  |
| Chapter_I_9   | ICD10 | Viral infections of the central nervous system | Number of times an International Classification of Diseases, 10th edition was documented in the year prior to imaging: Viral infections of the central nervous system (ICD10 Codes A80 - A89) |
| Chapter_II_1  | ICD10 | Malignant neoplasms                            | Number of times an International Classification of Diseases, 10th edition was documented in the year prior to imaging: Malignant neoplasms (ICD10 Codes C00 - C97)                            |
| Chapter_II_2  | ICD10 | In situ neoplasms                              | Number of times an International Classification of Diseases, 10th edition was documented in the year prior to imaging: In situ neoplasms (ICD10 Codes D00 - D09)                              |
| Chapter_II_3  | ICD10 | Benign neoplasms                               | Number of times an International Classification of Diseases, 10th edition was documented in the year prior to imaging: Benign neoplasms (ICD10 Codes D10 - D36)                               |
| Chapter_II_4  | ICD10 | Neoplasms of uncertain or unknown behaviour    | Number of times an International Classification of Diseases, 10th edition was documented in the year prior to imaging: Neoplasms of uncertain or unknown behaviour (ICD10 Codes D37 - D48)    |
| Chapter_III_1 | ICD10 | Nutritional anaemias                           | Number of times an International Classification of Diseases, 10th edition was documented in the year prior to imaging: Nutritional anaemias (ICD10 Codes D50 - D53)                           |

|                   |       |                                                                |                                                                                                                                                                                                               |
|-------------------|-------|----------------------------------------------------------------|---------------------------------------------------------------------------------------------------------------------------------------------------------------------------------------------------------------|
| Chapter_III_<br>2 | ICD10 | Haemolytic anaemias                                            | Number of times an International Classification of Diseases, 10th edition was documented in the year prior to imaging: Haemolytic anaemias (ICD10 Codes D55 - D59)                                            |
| Chapter_III_<br>3 | ICD10 | Aplastic and other anaemias                                    | Number of times an International Classification of Diseases, 10th edition was documented in the year prior to imaging: Aplastic and other anaemias (ICD10 Codes D60 - D64)                                    |
| Chapter_III_<br>4 | ICD10 | Coagulation defects, purpura and other haemorrhagic conditions | Number of times an International Classification of Diseases, 10th edition was documented in the year prior to imaging: Coagulation defects, purpura and other haemorrhagic conditions (ICD10 Codes D65 - D69) |
| Chapter_III_<br>5 | ICD10 | Other diseases of blood and blood-forming organs               | Number of times an International Classification of Diseases, 10th edition was documented in the year prior to imaging: Other diseases of blood and blood-forming organs (ICD10 Codes D70 - D77)               |
| Chapter_III_<br>6 | ICD10 | Certain disorders involving the immune mechanism               | Number of times an International Classification of Diseases, 10th edition was documented in the year prior to imaging: Certain disorders involving the immune mechanism (ICD10 Codes D80 - D89)               |
| Chapter_IV_<br>1  | ICD10 | Disorders of thyroid gland                                     | Number of times an International Classification of Diseases, 10th edition was documented in the year prior to imaging: Disorders of thyroid gland (ICD10 Codes E00 - E07)                                     |

|                  |       |                                                                         |                                                                                                                                                                                                                        |
|------------------|-------|-------------------------------------------------------------------------|------------------------------------------------------------------------------------------------------------------------------------------------------------------------------------------------------------------------|
| Chapter_IV_<br>2 | ICD10 | Diabetes mellitus                                                       | Number of times an International Classification of Diseases, 10th edition was documented in the year prior to imaging: Diabetes mellitus (ICD10 Codes E10 - E14)                                                       |
| Chapter_IV_<br>3 | ICD10 | Other disorders of glucose regulation and pancreatic internal secretion | Number of times an International Classification of Diseases, 10th edition was documented in the year prior to imaging: Other disorders of glucose regulation and pancreatic internal secretion (ICD10 Codes E15 - E16) |
| Chapter_IV_<br>4 | ICD10 | Disorders of other endocrine glands                                     | Number of times an International Classification of Diseases, 10th edition was documented in the year prior to imaging: Disorders of other endocrine glands (ICD10 Codes E20 - E35)                                     |
| Chapter_IV_<br>5 | ICD10 | Malnutrition                                                            | Number of times an International Classification of Diseases, 10th edition was documented in the year prior to imaging: Malnutrition (ICD10 Codes E40 - E46)                                                            |
| Chapter_IV_<br>6 | ICD10 | Other nutritional deficiencies                                          | Number of times an International Classification of Diseases, 10th edition was documented in the year prior to imaging: Other nutritional deficiencies (ICD10 Codes E50 - E64)                                          |
| Chapter_IV_<br>7 | ICD10 | Obesity and other hyperalimentation                                     | Number of times an International Classification of Diseases, 10th edition was documented in the year prior to imaging: Obesity and other hyperalimentation (ICD10 Codes E65 - E68)                                     |
| Chapter_IV_<br>8 | ICD10 | Metabolic disorders                                                     | Number of times an International Classification of Diseases, 10th edition was documented in the year prior to imaging: Metabolic disorders (ICD10 Codes E70 - E90)                                                     |

|                   |       |                                                               |                                                                                                                                                                                                              |
|-------------------|-------|---------------------------------------------------------------|--------------------------------------------------------------------------------------------------------------------------------------------------------------------------------------------------------------|
| Chapter_IX_<br>1  | ICD10 | Acute rheumatic fever                                         | Number of times an International Classification of Diseases, 10th edition was documented in the year prior to imaging: Acute rheumatic fever (ICD10 Codes I00 - I02)                                         |
| Chapter_IX_<br>10 | ICD10 | Other and unspecified disorders of the circulatory system     | Number of times an International Classification of Diseases, 10th edition was documented in the year prior to imaging: Other and unspecified disorders of the circulatory system (ICD10 Codes I95 - I99)     |
| Chapter_IX_<br>2  | ICD10 | Chronic rheumatic heart diseases                              | Number of times an International Classification of Diseases, 10th edition was documented in the year prior to imaging: Chronic rheumatic heart diseases (ICD10 Codes I05 - I09)                              |
| Chapter_IX_<br>3  | ICD10 | Hypertensive diseases                                         | Number of times an International Classification of Diseases, 10th edition was documented in the year prior to imaging: Hypertensive diseases (ICD10 Codes I10 - I15)                                         |
| Chapter_IX_<br>4  | ICD10 | Ischaemic heart diseases                                      | Number of times an International Classification of Diseases, 10th edition was documented in the year prior to imaging: Ischaemic heart diseases (ICD10 Codes I20 - I25)                                      |
| Chapter_IX_<br>5  | ICD10 | Pulmonary heart disease and diseases of pulmonary circulation | Number of times an International Classification of Diseases, 10th edition was documented in the year prior to imaging: Pulmonary heart disease and diseases of pulmonary circulation (ICD10 Codes I26 - I28) |

|              |       |                                                                                               |                                                                                                                                                                                                                                              |
|--------------|-------|-----------------------------------------------------------------------------------------------|----------------------------------------------------------------------------------------------------------------------------------------------------------------------------------------------------------------------------------------------|
| Chapter_IX_6 | ICD10 | Other forms of heart disease                                                                  | Number of times an International Classification of Diseases, 10th edition was documented in the year prior to imaging: Other forms of heart disease (ICD10 Codes I30 - I52)                                                                  |
| Chapter_IX_7 | ICD10 | Cerebrovascular diseases                                                                      | Number of times an International Classification of Diseases, 10th edition was documented in the year prior to imaging: Cerebrovascular diseases (ICD10 Codes I60 - I69)                                                                      |
| Chapter_IX_8 | ICD10 | Diseases of arteries, arterioles and capillaries                                              | Number of times an International Classification of Diseases, 10th edition was documented in the year prior to imaging: Diseases of arteries, arterioles and capillaries (ICD10 Codes I70 - I79)                                              |
| Chapter_IX_9 | ICD10 | Diseases of veins, lymphatic vessels and lymph nodes, not elsewhere classified                | Number of times an International Classification of Diseases, 10th edition was documented in the year prior to imaging: Diseases of veins, lymphatic vessels and lymph nodes, not elsewhere classified (ICD10 Codes I80 - I89)                |
| Chapter_V_1  | ICD10 | Organic, including symptomatic, mental disorders                                              | Number of times an International Classification of Diseases, 10th edition was documented in the year prior to imaging: Organic, including symptomatic, mental disorders (ICD10 Codes F00 - F09)                                              |
| Chapter_V_10 | ICD10 | Behavioural and emotional disorders with onset usually occurring in childhood and adolescence | Number of times an International Classification of Diseases, 10th edition was documented in the year prior to imaging: Behavioural and emotional disorders with onset usually occurring in childhood and adolescence (ICD10 Codes F90 - F98) |

|              |       |                                                                                       |                                                                                                                                                                                                                                      |
|--------------|-------|---------------------------------------------------------------------------------------|--------------------------------------------------------------------------------------------------------------------------------------------------------------------------------------------------------------------------------------|
| Chapter_V_11 | ICD10 | Unspecified mental disorder                                                           | Number of times an International Classification of Diseases, 10th edition was documented in the year prior to imaging: Unspecified mental disorder (ICD10 Codes F99 - F99)                                                           |
| Chapter_V_2  | ICD10 | Mental and behavioural disorders due to psychoactive substance use                    | Number of times an International Classification of Diseases, 10th edition was documented in the year prior to imaging: Mental and behavioural disorders due to psychoactive substance use (ICD10 Codes F10 - F19)                    |
| Chapter_V_3  | ICD10 | Schizophrenia, schizotypal and delusional disorders                                   | Number of times an International Classification of Diseases, 10th edition was documented in the year prior to imaging: Schizophrenia, schizotypal and delusional disorders (ICD10 Codes F20 - F29)                                   |
| Chapter_V_4  | ICD10 | Mood [affective] disorders                                                            | Number of times an International Classification of Diseases, 10th edition was documented in the year prior to imaging: Mood [affective] disorders (ICD10 Codes F30 - F39)                                                            |
| Chapter_V_5  | ICD10 | Neurotic, stress-related and somatoform disorders                                     | Number of times an International Classification of Diseases, 10th edition was documented in the year prior to imaging: Neurotic, stress-related and somatoform disorders (ICD10 Codes F40 - F48)                                     |
| Chapter_V_6  | ICD10 | Behavioural syndromes associated with physiological disturbances and physical factors | Number of times an International Classification of Diseases, 10th edition was documented in the year prior to imaging: Behavioural syndromes associated with physiological disturbances and physical factors (ICD10 Codes F50 - F59) |

|                   |       |                                                     |                                                                                                                                                                                                    |
|-------------------|-------|-----------------------------------------------------|----------------------------------------------------------------------------------------------------------------------------------------------------------------------------------------------------|
| Chapter_V_<br>7   | ICD10 | Disorders of adult personality and behaviour        | Number of times an International Classification of Diseases, 10th edition was documented in the year prior to imaging: Disorders of adult personality and behaviour (ICD10 Codes F60 - F69)        |
| Chapter_V_<br>8   | ICD10 | Mental retardation                                  | Number of times an International Classification of Diseases, 10th edition was documented in the year prior to imaging: Mental retardation (ICD10 Codes F70 - F79)                                  |
| Chapter_V_<br>9   | ICD10 | Disorders of psychological development              | Number of times an International Classification of Diseases, 10th edition was documented in the year prior to imaging: Disorders of psychological development (ICD10 Codes F80 - F89)              |
| Chapter_VI_<br>1  | ICD10 | Inflammatory diseases of the central nervous system | Number of times an International Classification of Diseases, 10th edition was documented in the year prior to imaging: Inflammatory diseases of the central nervous system (ICD10 Codes G00 - G09) |
| Chapter_VI_<br>10 | ICD10 | Cerebral palsy and other paralytic syndromes        | Number of times an International Classification of Diseases, 10th edition was documented in the year prior to imaging: Cerebral palsy and other paralytic syndromes (ICD10 Codes G80 - G83)        |
| Chapter_VI_<br>11 | ICD10 | Other disorders of the nervous system               | Number of times an International Classification of Diseases, 10th edition was documented in the year prior to imaging: Other disorders of the nervous system (ICD10 Codes G90 - G99)               |



|                  |       |                                                                   |                                                                                                                                                                                                                  |
|------------------|-------|-------------------------------------------------------------------|------------------------------------------------------------------------------------------------------------------------------------------------------------------------------------------------------------------|
| Chapter_VI_<br>2 | ICD10 | Systemic atrophies primarily affecting the central nervous system | Number of times an International Classification of Diseases, 10th edition was documented in the year prior to imaging: Systemic atrophies primarily affecting the central nervous system (ICD10 Codes G10 - G14) |
| Chapter_VI_<br>3 | ICD10 | Extrapyramidal and movement disorders                             | Number of times an International Classification of Diseases, 10th edition was documented in the year prior to imaging: Extrapyramidal and movement disorders (ICD10 Codes G20 - G26)                             |
| Chapter_VI_<br>4 | ICD10 | Other degenerative diseases of the nervous system                 | Number of times an International Classification of Diseases, 10th edition was documented in the year prior to imaging: Other degenerative diseases of the nervous system (ICD10 Codes G30 - G32)                 |
| Chapter_VI_<br>5 | ICD10 | Demyelinating diseases of the central nervous system              | Number of times an International Classification of Diseases, 10th edition was documented in the year prior to imaging: Demyelinating diseases of the central nervous system (ICD10 Codes G35 - G37)              |
| Chapter_VI_<br>6 | ICD10 | Episodic and paroxysmal disorders                                 | Number of times an International Classification of Diseases, 10th edition was documented in the year prior to imaging: Episodic and paroxysmal disorders (ICD10 Codes G40 - G47)                                 |
| Chapter_VI_<br>7 | ICD10 | Nerve, nerve root and plexus disorders                            | Number of times an International Classification of Diseases, 10th edition was documented in the year prior to imaging: Nerve, nerve root and plexus disorders (ICD10 Codes G50 - G59)                            |

|                |       |                                                                       |                                                                                                                                                                                                                      |
|----------------|-------|-----------------------------------------------------------------------|----------------------------------------------------------------------------------------------------------------------------------------------------------------------------------------------------------------------|
| Chapter_VI_8   | ICD10 | Polyneuropathies and other disorders of the peripheral nervous system | Number of times an International Classification of Diseases, 10th edition was documented in the year prior to imaging: Polyneuropathies and other disorders of the peripheral nervous system (ICD10 Codes G60 - G64) |
| Chapter_VI_9   | ICD10 | Diseases of myoneural junction and muscle                             | Number of times an International Classification of Diseases, 10th edition was documented in the year prior to imaging: Diseases of myoneural junction and muscle (ICD10 Codes G70 - G73)                             |
| Chapter_VII_1  | ICD10 | Disorders of eyelid, lacrimal system and orbit                        | Number of times an International Classification of Diseases, 10th edition was documented in the year prior to imaging: Disorders of eyelid, lacrimal system and orbit (ICD10 Codes H00 - H06)                        |
| Chapter_VII_10 | ICD10 | Visual disturbances and blindness                                     | Number of times an International Classification of Diseases, 10th edition was documented in the year prior to imaging: Visual disturbances and blindness (ICD10 Codes H53 - H54)                                     |
| Chapter_VII_11 | ICD10 | Other disorders of eye and adnexa                                     | Number of times an International Classification of Diseases, 10th edition was documented in the year prior to imaging: Other disorders of eye and adnexa (ICD10 Codes H55 - H59)                                     |
| Chapter_VII_2  | ICD10 | Disorders of conjunctiva                                              | Number of times an International Classification of Diseases, 10th edition was documented in the year prior to imaging: Disorders of conjunctiva (ICD10 Codes H10 - H13)                                              |

|                   |       |                                                    |                                                                                                                                                                                                   |
|-------------------|-------|----------------------------------------------------|---------------------------------------------------------------------------------------------------------------------------------------------------------------------------------------------------|
| Chapter_VII<br>_3 | ICD10 | Disorders of sclera, cornea, iris and ciliary body | Number of times an International Classification of Diseases, 10th edition was documented in the year prior to imaging: Disorders of sclera, cornea, iris and ciliary body (ICD10 Codes H15 - H22) |
| Chapter_VII<br>_4 | ICD10 | Disorders of lens                                  | Number of times an International Classification of Diseases, 10th edition was documented in the year prior to imaging: Disorders of lens (ICD10 Codes H25 - H28)                                  |
| Chapter_VII<br>_5 | ICD10 | Disorders of choroid and retina                    | Number of times an International Classification of Diseases, 10th edition was documented in the year prior to imaging: Disorders of choroid and retina (ICD10 Codes H30 - H36)                    |
| Chapter_VII<br>_6 | ICD10 | Glaucoma                                           | Number of times an International Classification of Diseases, 10th edition was documented in the year prior to imaging: Glaucoma (ICD10 Codes H40 - H42)                                           |
| Chapter_VII<br>_7 | ICD10 | Disorders of vitreous body and globe               | Number of times an International Classification of Diseases, 10th edition was documented in the year prior to imaging: Disorders of vitreous body and globe (ICD10 Codes H43 - H45)               |
| Chapter_VII<br>_8 | ICD10 | Disorders of optic nerve and visual pathways       | Number of times an International Classification of Diseases, 10th edition was documented in the year prior to imaging: Disorders of optic nerve and visual pathways (ICD10 Codes H46 - H48)       |

|                    |       |                                                                               |                                                                                                                                                                                                                              |
|--------------------|-------|-------------------------------------------------------------------------------|------------------------------------------------------------------------------------------------------------------------------------------------------------------------------------------------------------------------------|
| Chapter_VII<br>_9  | ICD10 | Disorders of ocular muscles, binocular movement, accommodation and refraction | Number of times an International Classification of Diseases, 10th edition was documented in the year prior to imaging: Disorders of ocular muscles, binocular movement, accommodation and refraction (ICD10 Codes H49 - H52) |
| Chapter_VIII<br>_1 | ICD10 | Diseases of external ear                                                      | Number of times an International Classification of Diseases, 10th edition was documented in the year prior to imaging: Diseases of external ear (ICD10 Codes H60 - H62)                                                      |
| Chapter_VIII<br>_2 | ICD10 | Diseases of middle ear and mastoid                                            | Number of times an International Classification of Diseases, 10th edition was documented in the year prior to imaging: Diseases of middle ear and mastoid (ICD10 Codes H65 - H75)                                            |
| Chapter_VIII<br>_3 | ICD10 | Diseases of inner ear                                                         | Number of times an International Classification of Diseases, 10th edition was documented in the year prior to imaging: Diseases of inner ear (ICD10 Codes H80 - H83)                                                         |
| Chapter_VIII<br>_4 | ICD10 | Other disorders of ear                                                        | Number of times an International Classification of Diseases, 10th edition was documented in the year prior to imaging: Other disorders of ear (ICD10 Codes H90 - H95)                                                        |
| Chapter_X_<br>1    | ICD10 | Acute upper respiratory infections                                            | Number of times an International Classification of Diseases, 10th edition was documented in the year prior to imaging: Acute upper respiratory infections (ICD10 Codes J00 - J06)                                            |

|                  |       |                                           |                                                                                                                                                                                          |
|------------------|-------|-------------------------------------------|------------------------------------------------------------------------------------------------------------------------------------------------------------------------------------------|
| Chapter_X_<br>10 | ICD10 | Other diseases of the respiratory system  | Number of times an International Classification of Diseases, 10th edition was documented in the year prior to imaging: Other diseases of the respiratory system (ICD10 Codes J95 - J99)  |
| Chapter_X_<br>2  | ICD10 | Influenza and pneumonia                   | Number of times an International Classification of Diseases, 10th edition was documented in the year prior to imaging: Influenza and pneumonia (ICD10 Codes J09 - J18)                   |
| Chapter_X_<br>3  | ICD10 | Other acute lower respiratory infections  | Number of times an International Classification of Diseases, 10th edition was documented in the year prior to imaging: Other acute lower respiratory infections (ICD10 Codes J20 - J22)  |
| Chapter_X_<br>4  | ICD10 | Other diseases of upper respiratory tract | Number of times an International Classification of Diseases, 10th edition was documented in the year prior to imaging: Other diseases of upper respiratory tract (ICD10 Codes J30 - J39) |
| Chapter_X_<br>5  | ICD10 | Chronic lower respiratory diseases        | Number of times an International Classification of Diseases, 10th edition was documented in the year prior to imaging: Chronic lower respiratory diseases (ICD10 Codes J40 - J47)        |
| Chapter_X_<br>6  | ICD10 | Lung diseases due to external agents      | Number of times an International Classification of Diseases, 10th edition was documented in the year prior to imaging: Lung diseases due to external agents (ICD10 Codes J60 - J70)      |

|               |       |                                                                   |                                                                                                                                                                                                                  |
|---------------|-------|-------------------------------------------------------------------|------------------------------------------------------------------------------------------------------------------------------------------------------------------------------------------------------------------|
| Chapter_X_7   | ICD10 | Other respiratory diseases principally affecting the interstitium | Number of times an International Classification of Diseases, 10th edition was documented in the year prior to imaging: Other respiratory diseases principally affecting the interstitium (ICD10 Codes J80 - J84) |
| Chapter_X_8   | ICD10 | Suppurative and necrotic conditions of lower respiratory tract    | Number of times an International Classification of Diseases, 10th edition was documented in the year prior to imaging: Suppurative and necrotic conditions of lower respiratory tract (ICD10 Codes J85 - J86)    |
| Chapter_X_9   | ICD10 | Other diseases of pleura                                          | Number of times an International Classification of Diseases, 10th edition was documented in the year prior to imaging: Other diseases of pleura (ICD10 Codes J90 - J94)                                          |
| Chapter_XI_1  | ICD10 | Diseases of oral cavity, salivary glands and jaws                 | Number of times an International Classification of Diseases, 10th edition was documented in the year prior to imaging: Diseases of oral cavity, salivary glands and jaws (ICD10 Codes K00 - K14)                 |
| Chapter_XI_10 | ICD10 | Other diseases of the digestive system                            | Number of times an International Classification of Diseases, 10th edition was documented in the year prior to imaging: Other diseases of the digestive system (ICD10 Codes K90 - K93)                            |
| Chapter_XI_2  | ICD10 | Bullous disorders                                                 | Number of times an International Classification of Diseases, 10th edition was documented in the year prior to imaging: Bullous disorders (ICD10 Codes L10 - L14)                                                 |

|                  |       |                                    |                                                                                                                                                                                   |
|------------------|-------|------------------------------------|-----------------------------------------------------------------------------------------------------------------------------------------------------------------------------------|
| Chapter_XI_<br>3 | ICD10 | Dermatitis and eczema              | Number of times an International Classification of Diseases, 10th edition was documented in the year prior to imaging: Dermatitis and eczema (ICD10 Codes L20 - L30)              |
| Chapter_XI_<br>4 | ICD10 | Papulosquamous disorders           | Number of times an International Classification of Diseases, 10th edition was documented in the year prior to imaging: Papulosquamous disorders (ICD10 Codes L40 - L45)           |
| Chapter_XI_<br>5 | ICD10 | Noninfective enteritis and colitis | Number of times an International Classification of Diseases, 10th edition was documented in the year prior to imaging: Noninfective enteritis and colitis (ICD10 Codes K50 - K52) |
| Chapter_XI_<br>6 | ICD10 | Other diseases of intestines       | Number of times an International Classification of Diseases, 10th edition was documented in the year prior to imaging: Other diseases of intestines (ICD10 Codes K55 - K64)       |
| Chapter_XI_<br>7 | ICD10 | Diseases of peritoneum             | Number of times an International Classification of Diseases, 10th edition was documented in the year prior to imaging: Diseases of peritoneum (ICD10 Codes K65 - K67)             |
| Chapter_XI_<br>8 | ICD10 | Diseases of liver                  | Number of times an International Classification of Diseases, 10th edition was documented in the year prior to imaging: Diseases of liver (ICD10 Codes K70 - K77)                  |

|                    |       |                                                      |                                                                                                                                                                                                     |
|--------------------|-------|------------------------------------------------------|-----------------------------------------------------------------------------------------------------------------------------------------------------------------------------------------------------|
| Chapter_XI_<br>_9  | ICD10 | Disorders of gallbladder, biliary tract and pancreas | Number of times an International Classification of Diseases, 10th edition was documented in the year prior to imaging: Disorders of gallbladder, biliary tract and pancreas (ICD10 Codes K80 - K87) |
| Chapter_XII_<br>_1 | ICD10 | Infections of the skin and subcutaneous tissue       | Number of times an International Classification of Diseases, 10th edition was documented in the year prior to imaging: Infections of the skin and subcutaneous tissue (ICD10 Codes L00 - L08)       |
| Chapter_XII_<br>_2 | ICD10 | Bullous disorders                                    | Number of times an International Classification of Diseases, 10th edition was documented in the year prior to imaging: Bullous disorders (ICD10 Codes L10 - L14)                                    |
| Chapter_XII_<br>_3 | ICD10 | Dermatitis and eczema                                | Number of times an International Classification of Diseases, 10th edition was documented in the year prior to imaging: Dermatitis and eczema (ICD10 Codes L20 - L30)                                |
| Chapter_XII_<br>_4 | ICD10 | Papulosquamous disorders                             | Number of times an International Classification of Diseases, 10th edition was documented in the year prior to imaging: Papulosquamous disorders (ICD10 Codes L40 - L45)                             |
| Chapter_XII_<br>_5 | ICD10 | Urticaria and erythema                               | Number of times an International Classification of Diseases, 10th edition was documented in the year prior to imaging: Urticaria and erythema (ICD10 Codes L50 - L54)                               |



|                    |       |                                                                 |                                                                                                                                                                                                                |
|--------------------|-------|-----------------------------------------------------------------|----------------------------------------------------------------------------------------------------------------------------------------------------------------------------------------------------------------|
| Chapter_XII<br>_6  | ICD10 | Radiation-related disorders of the skin and subcutaneous tissue | Number of times an International Classification of Diseases, 10th edition was documented in the year prior to imaging: Radiation-related disorders of the skin and subcutaneous tissue (ICD10 Codes L55 - L59) |
| Chapter_XII<br>_7  | ICD10 | Disorders of skin appendages                                    | Number of times an International Classification of Diseases, 10th edition was documented in the year prior to imaging: Disorders of skin appendages (ICD10 Codes L60 - L75)                                    |
| Chapter_XII<br>_8  | ICD10 | Other disorders of the skin and subcutaneous tissue             | Number of times an International Classification of Diseases, 10th edition was documented in the year prior to imaging: Other disorders of the skin and subcutaneous tissue (ICD10 Codes L80 - L99)             |
| Chapter_XIII<br>_1 | ICD10 | Arthropathies                                                   | Number of times an International Classification of Diseases, 10th edition was documented in the year prior to imaging: Arthropathies (ICD10 Codes M00 - M25)                                                   |
| Chapter_XIII<br>_2 | ICD10 | Systemic connective tissue disorders                            | Number of times an International Classification of Diseases, 10th edition was documented in the year prior to imaging: Systemic connective tissue disorders (ICD10 Codes M30 - M36)                            |
| Chapter_XIII<br>_3 | ICD10 | Dorsopathies                                                    | Number of times an International Classification of Diseases, 10th edition was documented in the year prior to imaging: Dorsopathies (ICD10 Codes M40 - M54)                                                    |

|                    |       |                                                                     |                                                                                                                                                                                                                    |
|--------------------|-------|---------------------------------------------------------------------|--------------------------------------------------------------------------------------------------------------------------------------------------------------------------------------------------------------------|
| Chapter_XIII<br>_4 | ICD10 | Soft tissue disorders                                               | Number of times an International Classification of Diseases, 10th edition was documented in the year prior to imaging: Soft tissue disorders (ICD10 Codes M60 - M79)                                               |
| Chapter_XIII<br>_5 | ICD10 | Osteopathies and chondropathies                                     | Number of times an International Classification of Diseases, 10th edition was documented in the year prior to imaging: Osteopathies and chondropathies (ICD10 Codes M80 - M94)                                     |
| Chapter_XIII<br>_6 | ICD10 | Other disorders of the musculoskeletal system and connective tissue | Number of times an International Classification of Diseases, 10th edition was documented in the year prior to imaging: Other disorders of the musculoskeletal system and connective tissue (ICD10 Codes M95 - M99) |
| Chapter_XI<br>V_1  | ICD10 | Glomerular diseases                                                 | Number of times an International Classification of Diseases, 10th edition was documented in the year prior to imaging: Glomerular diseases (ICD10 Codes N00 - N08)                                                 |
| Chapter_XI<br>V_10 | ICD10 | Noninflammatory disorders of female genital tract                   | Number of times an International Classification of Diseases, 10th edition was documented in the year prior to imaging: Noninflammatory disorders of female genital tract (ICD10 Codes N80 - N98)                   |
| Chapter_XI<br>V_11 | ICD10 | Other disorders of the genitourinary system                         | Number of times an International Classification of Diseases, 10th edition was documented in the year prior to imaging: Other disorders of the genitourinary system (ICD10 Codes N99 - N99)                         |

|                   |       |                                      |                                                                                                                                                                                     |
|-------------------|-------|--------------------------------------|-------------------------------------------------------------------------------------------------------------------------------------------------------------------------------------|
| Chapter_XI<br>V_2 | ICD10 | Renal tubulo-interstitial diseases   | Number of times an International Classification of Diseases, 10th edition was documented in the year prior to imaging: Renal tubulo-interstitial diseases (ICD10 Codes N10 - N16)   |
| Chapter_XI<br>V_3 | ICD10 | Renal failure                        | Number of times an International Classification of Diseases, 10th edition was documented in the year prior to imaging: Renal failure (ICD10 Codes N17 - N19)                        |
| Chapter_XI<br>V_4 | ICD10 | Urolithiasis                         | Number of times an International Classification of Diseases, 10th edition was documented in the year prior to imaging: Urolithiasis (ICD10 Codes N20 - N23)                         |
| Chapter_XI<br>V_5 | ICD10 | Other disorders of kidney and ureter | Number of times an International Classification of Diseases, 10th edition was documented in the year prior to imaging: Other disorders of kidney and ureter (ICD10 Codes N25 - N29) |
| Chapter_XI<br>V_6 | ICD10 | Other diseases of urinary system     | Number of times an International Classification of Diseases, 10th edition was documented in the year prior to imaging: Other diseases of urinary system (ICD10 Codes N30 - N39)     |
| Chapter_XI<br>V_7 | ICD10 | Diseases of male genital organs      | Number of times an International Classification of Diseases, 10th edition was documented in the year prior to imaging: Diseases of male genital organs (ICD10 Codes N40 - N51)      |
| Chapter_XI<br>V_8 | ICD10 | Disorders of breast                  | Number of times an International Classification of Diseases, 10th edition was documented in the year prior to imaging: Disorders of breast (ICD10 Codes N60 - N64)                  |

|                    |       |                                                            |                                                                                                                                                                                                           |
|--------------------|-------|------------------------------------------------------------|-----------------------------------------------------------------------------------------------------------------------------------------------------------------------------------------------------------|
| Chapter_XI<br>V_9  | ICD10 | Inflammatory diseases of female pelvic organs              | Number of times an International Classification of Diseases, 10th edition was documented in the year prior to imaging: Inflammatory diseases of female pelvic organs (ICD10 Codes N70 - N77)              |
| Chapter_XI<br>X_1  | ICD10 | Injuries to the head                                       | Number of times an International Classification of Diseases, 10th edition was documented in the year prior to imaging: Injuries to the head (ICD10 Codes S00 - S09)                                       |
| Chapter_XI<br>X_10 | ICD10 | Injuries to the ankle and foot                             | Number of times an International Classification of Diseases, 10th edition was documented in the year prior to imaging: Injuries to the ankle and foot (ICD10 Codes S90 - S99)                             |
| Chapter_XI<br>X_11 | ICD10 | Injuries involving multiple body regions                   | Number of times an International Classification of Diseases, 10th edition was documented in the year prior to imaging: Injuries involving multiple body regions (ICD10 Codes T00 - T07)                   |
| Chapter_XI<br>X_12 | ICD10 | Injuries to unspecified part of trunk, limb or body region | Number of times an International Classification of Diseases, 10th edition was documented in the year prior to imaging: Injuries to unspecified part of trunk, limb or body region (ICD10 Codes T08 - T14) |
| Chapter_XI<br>X_13 | ICD10 | Effects of foreign body entering through natural orifice   | Number of times an International Classification of Diseases, 10th edition was documented in the year prior to imaging: Effects of foreign body entering through natural orifice (ICD10 Codes T15 - T19)   |

|                    |       |                                                               |                                                                                                                                                                                                              |
|--------------------|-------|---------------------------------------------------------------|--------------------------------------------------------------------------------------------------------------------------------------------------------------------------------------------------------------|
| Chapter_XI<br>X_14 | ICD10 | Burns and corrosions                                          | Number of times an International Classification of Diseases, 10th edition was documented in the year prior to imaging: Burns and corrosions (ICD10 Codes T20 - T32)                                          |
| Chapter_XI<br>X_16 | ICD10 | Poisoning by drugs, medicaments and biological substances     | Number of times an International Classification of Diseases, 10th edition was documented in the year prior to imaging: Poisoning by drugs, medicaments and biological substances (ICD10 Codes T36 - T50)     |
| Chapter_XI<br>X_17 | ICD10 | Toxic effects of substances chiefly nonmedicinal as to source | Number of times an International Classification of Diseases, 10th edition was documented in the year prior to imaging: Toxic effects of substances chiefly nonmedicinal as to source (ICD10 Codes T51 - T65) |
| Chapter_XI<br>X_18 | ICD10 | Other and unspecified effects of external causes              | Number of times an International Classification of Diseases, 10th edition was documented in the year prior to imaging: Other and unspecified effects of external causes (ICD10 Codes T66 - T78)              |
| Chapter_XI<br>X_19 | ICD10 | Certain early complications of trauma                         | Number of times an International Classification of Diseases, 10th edition was documented in the year prior to imaging: Certain early complications of trauma (ICD10 Codes T79 - T79)                         |
| Chapter_XI<br>X_2  | ICD10 | Injuries to the neck                                          | Number of times an International Classification of Diseases, 10th edition was documented in the year prior to imaging: Injuries to the neck (ICD10 Codes S10 - S19)                                          |

|                    |       |                                                                      |                                                                                                                                                                                                                     |
|--------------------|-------|----------------------------------------------------------------------|---------------------------------------------------------------------------------------------------------------------------------------------------------------------------------------------------------------------|
| Chapter_XI<br>X_20 | ICD10 | Complications of surgical and medical care, not elsewhere classified | Number of times an International Classification of Diseases, 10th edition was documented in the year prior to imaging: Complications of surgical and medical care, not elsewhere classified (ICD10 Codes T80 - T88) |
| Chapter_XI<br>X_3  | ICD10 | Injuries to the thorax                                               | Number of times an International Classification of Diseases, 10th edition was documented in the year prior to imaging: Injuries to the thorax (ICD10 Codes S20 - S29)                                               |
| Chapter_XI<br>X_4  | ICD10 | Injuries to the abdomen, lower back, lumbar spine and pelvis         | Number of times an International Classification of Diseases, 10th edition was documented in the year prior to imaging: Injuries to the abdomen, lower back, lumbar spine and pelvis (ICD10 Codes S30 - S39)         |
| Chapter_XI<br>X_5  | ICD10 | Injuries to the shoulder and upper arm                               | Number of times an International Classification of Diseases, 10th edition was documented in the year prior to imaging: Injuries to the shoulder and upper arm (ICD10 Codes S40 - S49)                               |
| Chapter_XI<br>X_6  | ICD10 | Injuries to the elbow and forearm                                    | Number of times an International Classification of Diseases, 10th edition was documented in the year prior to imaging: Injuries to the elbow and forearm (ICD10 Codes S50 - S59)                                    |
| Chapter_XI<br>X_7  | ICD10 | Injuries to the wrist and hand                                       | Number of times an International Classification of Diseases, 10th edition was documented in the year prior to imaging: Injuries to the wrist and hand (ICD10 Codes S60 - S69)                                       |

|                   |       |                                                                                            |                                                                                                                                                                                                                                           |
|-------------------|-------|--------------------------------------------------------------------------------------------|-------------------------------------------------------------------------------------------------------------------------------------------------------------------------------------------------------------------------------------------|
| Chapter_XI<br>X_8 | ICD10 | Injuries to the hip and thigh                                                              | Number of times an International Classification of Diseases, 10th edition was documented in the year prior to imaging: Injuries to the hip and thigh (ICD10 Codes S70 - S79)                                                              |
| Chapter_XI<br>X_9 | ICD10 | Injuries to the knee and lower leg                                                         | Number of times an International Classification of Diseases, 10th edition was documented in the year prior to imaging: Injuries to the knee and lower leg (ICD10 Codes S80 - S89)                                                         |
| Chapter_XV<br>_1  | ICD10 | Pregnancy with abortive outcome                                                            | Number of times an International Classification of Diseases, 10th edition was documented in the year prior to imaging: Pregnancy with abortive outcome (ICD10 Codes O00 - O08)                                                            |
| Chapter_XV<br>_2  | ICD10 | Oedema, proteinuria and hypertensive disorders in pregnancy, childbirth and the puerperium | Number of times an International Classification of Diseases, 10th edition was documented in the year prior to imaging: Oedema, proteinuria and hypertensive disorders in pregnancy, childbirth and the puerperium (ICD10 Codes O10 - O16) |
| Chapter_XV<br>_3  | ICD10 | Other maternal disorders predominantly related to pregnancy                                | Number of times an International Classification of Diseases, 10th edition was documented in the year prior to imaging: Other maternal disorders predominantly related to pregnancy (ICD10 Codes O20 - O29)                                |
| Chapter_XV<br>_4  | ICD10 | Maternal care related to the fetus and amniotic cavity and possible delivery problems      | Number of times an International Classification of Diseases, 10th edition was documented in the year prior to imaging: Maternal care related to the fetus and amniotic cavity and possible delivery problems (ICD10 Codes O30 - O48)      |

|                    |       |                                                                                                       |                                                                                                                                                                                                                                                      |
|--------------------|-------|-------------------------------------------------------------------------------------------------------|------------------------------------------------------------------------------------------------------------------------------------------------------------------------------------------------------------------------------------------------------|
| Chapter_XV<br>_5   | ICD10 | Complications of labour and delivery                                                                  | Number of times an International Classification of Diseases, 10th edition was documented in the year prior to imaging: Complications of labour and delivery (ICD10 Codes O60 - O75)                                                                  |
| Chapter_XV<br>_6   | ICD10 | Delivery                                                                                              | Number of times an International Classification of Diseases, 10th edition was documented in the year prior to imaging: Delivery (ICD10 Codes O80 - O84)                                                                                              |
| Chapter_XV<br>_7   | ICD10 | Complications predominantly related to the puerperium                                                 | Number of times an International Classification of Diseases, 10th edition was documented in the year prior to imaging: Complications predominantly related to the puerperium (ICD10 Codes O85 - O92)                                                 |
| Chapter_XV<br>_8   | ICD10 | Other obstetric conditions, not elsewhere classified                                                  | Number of times an International Classification of Diseases, 10th edition was documented in the year prior to imaging: Other obstetric conditions, not elsewhere classified (ICD10 Codes O94 - O99)                                                  |
| Chapter_XV<br>I_1  | ICD10 | Fetus and newborn affected by maternal factors and by complications of pregnancy, labour and delivery | Number of times an International Classification of Diseases, 10th edition was documented in the year prior to imaging: Fetus and newborn affected by maternal factors and by complications of pregnancy, labour and delivery (ICD10 Codes P00 - P04) |
| Chapter_XV<br>I_10 | ICD10 | Other disorders originating in the perinatal period                                                   | Number of times an International Classification of Diseases, 10th edition was documented in the year prior to imaging: Other disorders originating in the perinatal period (ICD10 Codes P90 - P96)                                                   |



|                   |       |                                                                            |                                                                                                                                                                                                                           |
|-------------------|-------|----------------------------------------------------------------------------|---------------------------------------------------------------------------------------------------------------------------------------------------------------------------------------------------------------------------|
| Chapter_XV<br>I_2 | ICD10 | Disorders related to length of gestation and fetal growth                  | Number of times an International Classification of Diseases, 10th edition was documented in the year prior to imaging: Disorders related to length of gestation and fetal growth (ICD10 Codes P05 - P08)                  |
| Chapter_XV<br>I_4 | ICD10 | Respiratory and cardiovascular disorders specific to the perinatal period  | Number of times an International Classification of Diseases, 10th edition was documented in the year prior to imaging: Respiratory and cardiovascular disorders specific to the perinatal period (ICD10 Codes P20 - P29)  |
| Chapter_XV<br>I_6 | ICD10 | Haemorrhagic and haematological disorders of fetus and newborn             | Number of times an International Classification of Diseases, 10th edition was documented in the year prior to imaging: Haemorrhagic and haematological disorders of fetus and newborn (ICD10 Codes P50 - P61)             |
| Chapter_XV<br>I_7 | ICD10 | Transitory endocrine and metabolic disorders specific to fetus and newborn | Number of times an International Classification of Diseases, 10th edition was documented in the year prior to imaging: Transitory endocrine and metabolic disorders specific to fetus and newborn (ICD10 Codes P70 - P74) |
| Chapter_XV<br>I_8 | ICD10 | Digestive system disorders of fetus and newborn                            | Number of times an International Classification of Diseases, 10th edition was documented in the year prior to imaging: Digestive system disorders of fetus and newborn (ICD10 Codes P75 - P78)                            |

|                     |       |                                                     |                                                                                                                                                                                                    |
|---------------------|-------|-----------------------------------------------------|----------------------------------------------------------------------------------------------------------------------------------------------------------------------------------------------------|
| Chapter_XV<br>II_1  | ICD10 | Congenital malformations of the nervous system      | Number of times an International Classification of Diseases, 10th edition was documented in the year prior to imaging: Congenital malformations of the nervous system (ICD10 Codes Q00 - Q07)      |
| Chapter_XV<br>II_10 | ICD10 | Other congenital malformations                      | Number of times an International Classification of Diseases, 10th edition was documented in the year prior to imaging: Other congenital malformations (ICD10 Codes Q80 - Q89)                      |
| Chapter_XV<br>II_11 | ICD10 | Chromosomal abnormalities, not elsewhere classified | Number of times an International Classification of Diseases, 10th edition was documented in the year prior to imaging: Chromosomal abnormalities, not elsewhere classified (ICD10 Codes Q90 - Q99) |
| Chapter_XV<br>II_2  | ICD10 | Congenital malformations of eye, ear, face and neck | Number of times an International Classification of Diseases, 10th edition was documented in the year prior to imaging: Congenital malformations of eye, ear, face and neck (ICD10 Codes Q10 - Q18) |
| Chapter_XV<br>II_3  | ICD10 | Congenital malformations of the circulatory system  | Number of times an International Classification of Diseases, 10th edition was documented in the year prior to imaging: Congenital malformations of the circulatory system (ICD10 Codes Q20 - Q28)  |
| Chapter_XV<br>II_4  | ICD10 | Congenital malformations of the respiratory system  | Number of times an International Classification of Diseases, 10th edition was documented in the year prior to imaging: Congenital malformations of the respiratory system (ICD10 Codes Q30 - Q34)  |

|                     |       |                                                                         |                                                                                                                                                                                                                        |
|---------------------|-------|-------------------------------------------------------------------------|------------------------------------------------------------------------------------------------------------------------------------------------------------------------------------------------------------------------|
| Chapter_XV<br>II_5  | ICD10 | Cleft lip and cleft palate                                              | Number of times an International Classification of Diseases, 10th edition was documented in the year prior to imaging: Cleft lip and cleft palate (ICD10 Codes Q35 - Q37)                                              |
| Chapter_XV<br>II_6  | ICD10 | Other congenital malformations of the digestive system                  | Number of times an International Classification of Diseases, 10th edition was documented in the year prior to imaging: Other congenital malformations of the digestive system (ICD10 Codes Q38 - Q45)                  |
| Chapter_XV<br>II_7  | ICD10 | Congenital malformations of genital organs                              | Number of times an International Classification of Diseases, 10th edition was documented in the year prior to imaging: Congenital malformations of genital organs (ICD10 Codes Q50 - Q56)                              |
| Chapter_XV<br>II_8  | ICD10 | Congenital malformations of the urinary system                          | Number of times an International Classification of Diseases, 10th edition was documented in the year prior to imaging: Congenital malformations of the urinary system (ICD10 Codes Q60 - Q64)                          |
| Chapter_XV<br>II_9  | ICD10 | Congenital malformations and deformations of the musculoskeletal system | Number of times an International Classification of Diseases, 10th edition was documented in the year prior to imaging: Congenital malformations and deformations of the musculoskeletal system (ICD10 Codes Q65 - Q79) |
| Chapter_XV<br>III_1 | ICD10 | Symptoms and signs involving the circulatory and respiratory systems    | Number of times an International Classification of Diseases, 10th edition was documented in the year prior to imaging: Symptoms and signs involving the circulatory and respiratory systems (ICD10 Codes R00 - R09)    |

|                      |       |                                                                                                  |                                                                                                                                                                                                                                                 |
|----------------------|-------|--------------------------------------------------------------------------------------------------|-------------------------------------------------------------------------------------------------------------------------------------------------------------------------------------------------------------------------------------------------|
| Chapter_XV<br>III_10 | ICD10 | Abnormal findings on examination of urine, without diagnosis                                     | Number of times an International Classification of Diseases, 10th edition was documented in the year prior to imaging: Abnormal findings on examination of urine, without diagnosis (ICD10 Codes R80 - R82)                                     |
| Chapter_XV<br>III_11 | ICD10 | Abnormal findings on examination of other body fluids, substances and tissues, without diagnosis | Number of times an International Classification of Diseases, 10th edition was documented in the year prior to imaging: Abnormal findings on examination of other body fluids, substances and tissues, without diagnosis (ICD10 Codes R83 - R89) |
| Chapter_XV<br>III_12 | ICD10 | Abnormal findings on diagnostic imaging and in function studies, without diagnosis               | Number of times an International Classification of Diseases, 10th edition was documented in the year prior to imaging: Abnormal findings on diagnostic imaging and in function studies, without diagnosis (ICD10 Codes R90 - R94)               |
| Chapter_XV<br>III_13 | ICD10 | Ill-defined and unknown causes of mortality                                                      | Number of times an International Classification of Diseases, 10th edition was documented in the year prior to imaging: Ill-defined and unknown causes of mortality (ICD10 Codes R95 - R99)                                                      |
| Chapter_XV<br>III_2  | ICD10 | Symptoms and signs involving the digestive system and abdomen                                    | Number of times an International Classification of Diseases, 10th edition was documented in the year prior to imaging: Symptoms and signs involving the digestive system and abdomen (ICD10 Codes R10 - R19)                                    |

|                     |       |                                                                                   |                                                                                                                                                                                                                                  |
|---------------------|-------|-----------------------------------------------------------------------------------|----------------------------------------------------------------------------------------------------------------------------------------------------------------------------------------------------------------------------------|
| Chapter_XV<br>III_3 | ICD10 | Symptoms and signs involving the skin and subcutaneous tissue                     | Number of times an International Classification of Diseases, 10th edition was documented in the year prior to imaging: Symptoms and signs involving the skin and subcutaneous tissue (ICD10 Codes R20 - R23)                     |
| Chapter_XV<br>III_4 | ICD10 | Symptoms and signs involving the nervous and musculoskeletal systems              | Number of times an International Classification of Diseases, 10th edition was documented in the year prior to imaging: Symptoms and signs involving the nervous and musculoskeletal systems (ICD10 Codes R25 - R29)              |
| Chapter_XV<br>III_5 | ICD10 | Symptoms and signs involving the urinary system                                   | Number of times an International Classification of Diseases, 10th edition was documented in the year prior to imaging: Symptoms and signs involving the urinary system (ICD10 Codes R30 - R39)                                   |
| Chapter_XV<br>III_6 | ICD10 | Symptoms and signs involving cognition, perception, emotional state and behaviour | Number of times an International Classification of Diseases, 10th edition was documented in the year prior to imaging: Symptoms and signs involving cognition, perception, emotional state and behaviour (ICD10 Codes R40 - R46) |
| Chapter_XV<br>III_7 | ICD10 | Symptoms and signs involving speech and voice                                     | Number of times an International Classification of Diseases, 10th edition was documented in the year prior to imaging: Symptoms and signs involving speech and voice (ICD10 Codes R47 - R49)                                     |

|                     |       |                                                              |                                                                                                                                                                                                             |
|---------------------|-------|--------------------------------------------------------------|-------------------------------------------------------------------------------------------------------------------------------------------------------------------------------------------------------------|
| Chapter_XV<br>III_8 | ICD10 | General symptoms and signs                                   | Number of times an International Classification of Diseases, 10th edition was documented in the year prior to imaging: General symptoms and signs (ICD10 Codes R50 - R69)                                   |
| Chapter_XV<br>III_9 | ICD10 | Abnormal findings on examination of blood, without diagnosis | Number of times an International Classification of Diseases, 10th edition was documented in the year prior to imaging: Abnormal findings on examination of blood, without diagnosis (ICD10 Codes R70 - R79) |
| Chapter_XX<br>_1    | ICD10 | Accidents                                                    | Number of times an International Classification of Diseases, 10th edition was documented in the year prior to imaging: Accidents (ICD10 Codes V01 - X59)                                                    |
| Chapter_XX<br>_2    | ICD10 | Intentional self-harm                                        | Number of times an International Classification of Diseases, 10th edition was documented in the year prior to imaging: Intentional self-harm (ICD10 Codes X60 - X84)                                        |
| Chapter_XX<br>_3    | ICD10 | Assault                                                      | Number of times an International Classification of Diseases, 10th edition was documented in the year prior to imaging: Assault (ICD10 Codes X85 - Y09)                                                      |
| Chapter_XX<br>_4    | ICD10 | Event of undetermined intent                                 | Number of times an International Classification of Diseases, 10th edition was documented in the year prior to imaging: Event of undetermined intent (ICD10 Codes Y10 - Y34)                                 |
| Chapter_XX<br>_5    | ICD10 | Legal intervention and operations of war                     | Number of times an International Classification of Diseases, 10th edition was documented in the year prior to imaging: Legal intervention and operations of war (ICD10 Codes Y35 - Y36)                     |

|                   |       |                                                                                         |                                                                                                                                                                                                                                        |
|-------------------|-------|-----------------------------------------------------------------------------------------|----------------------------------------------------------------------------------------------------------------------------------------------------------------------------------------------------------------------------------------|
| Chapter_XX<br>_6  | ICD10 | Complications of medical and surgical care                                              | Number of times an International Classification of Diseases, 10th edition was documented in the year prior to imaging: Complications of medical and surgical care (ICD10 Codes Y40 - Y84)                                              |
| Chapter_XX<br>_8  | ICD10 | Supplementary factors related to causes of morbidity and mortality classified elsewhere | Number of times an International Classification of Diseases, 10th edition was documented in the year prior to imaging: Supplementary factors related to causes of morbidity and mortality classified elsewhere (ICD10 Codes Y90 - Y98) |
| Chapter_XX<br>I_1 | ICD10 | Persons encountering health services for examination and investigation                  | Number of times an International Classification of Diseases, 10th edition was documented in the year prior to imaging: Persons encountering health services for examination and investigation (ICD10 Codes Z00 - Z13)                  |
| Chapter_XX<br>I_2 | ICD10 | Persons with potential health hazards related to communicable diseases                  | Number of times an International Classification of Diseases, 10th edition was documented in the year prior to imaging: Persons with potential health hazards related to communicable diseases (ICD10 Codes Z20 - Z29)                  |
| Chapter_XX<br>I_3 | ICD10 | Persons encountering health services in circumstances related to reproduction           | Number of times an International Classification of Diseases, 10th edition was documented in the year prior to imaging: Persons encountering health services in circumstances related to reproduction (ICD10 Codes Z30 - Z39)           |

|                         |       |                                                                                                                               |                                                                                                                                                                                                                                                                              |
|-------------------------|-------|-------------------------------------------------------------------------------------------------------------------------------|------------------------------------------------------------------------------------------------------------------------------------------------------------------------------------------------------------------------------------------------------------------------------|
| Chapter_XX<br>I_4       | ICD10 | Persons encountering health services for specific procedures and health care                                                  | Number of times an International Classification of Diseases, 10th edition was documented in the year prior to imaging: Persons encountering health services for specific procedures and health care (ICD10 Codes Z40 - Z54)                                                  |
| Chapter_XX<br>I_5       | ICD10 | Persons with potential health hazards related to socioeconomic and psychosocial circumstances                                 | Number of times an International Classification of Diseases, 10th edition was documented in the year prior to imaging: Persons with potential health hazards related to socioeconomic and psychosocial circumstances (ICD10 Codes Z55 - Z65)                                 |
| Chapter_XX<br>I_6       | ICD10 | Persons encountering health services in other circumstances                                                                   | Number of times an International Classification of Diseases, 10th edition was documented in the year prior to imaging: Persons encountering health services in other circumstances (ICD10 Codes Z70 - Z76)                                                                   |
| Chapter_XX<br>I_7       | ICD10 | Persons with potential health hazards related to family and personal history and certain conditions influencing health status | Number of times an International Classification of Diseases, 10th edition was documented in the year prior to imaging: Persons with potential health hazards related to family and personal history and certain conditions influencing health status (ICD10 Codes Z80 - Z99) |
| exp_wt_lab_<br>chol_hdl | Labs  | HDL Cholesterol: exponentially weighted average                                                                               | Exponentially weighted average of measurements or estimates of high density lipoprotein cholesterol during the year prior to abdominal scan [mg/dL]                                                                                                                          |



|                         |      |                                                   |                                                                                                                                                    |
|-------------------------|------|---------------------------------------------------|----------------------------------------------------------------------------------------------------------------------------------------------------|
| exp_wt_lab_chol_ldl     | Labs | LDL Cholesterol: exponentially weighted average   | Exponentially weighted average of measurements or estimates of low density lipoprotein cholesterol during the year prior to abdominal scan [mg/dL] |
| exp_wt_lab_chol_total   | Labs | Total Cholesterol: exponentially weighted average | Exponentially weighted average of measurements or estimates of total cholesterol during the year prior to abdominal scan [mg/dL]                   |
| exp_wt_lab_gluc         | Labs | Serum glucose: exponentially weighted average     | Exponentially weighted average of measurements of serum glucose during the year prior to abdominal scan [mg/dL]                                    |
| exp_wt_lab_hba1c        | Labs | HbA1c: exponentially weighted average             | Exponentially weighted average of measurements of hemoglobin A1c during the year prior to abdominal scan [%]                                       |
| exp_wt_lab_trig         | Labs | Triglycerides: exponentially weighted average     | Exponentially weighted average of measurements or estimates of triglycerides during the year prior to abdominal scan [mg/dL]                       |
| latest_value_chol_hdl   | Labs | HDL Cholesterol: latest value                     | Latest available value of high density lipoprotein cholesterol during the year prior to abdominal scan [mg/dL]                                     |
| latest_value_chol_ldl   | Labs | LDL Cholesterol: latest value                     | Latest available value of low density lipoprotein cholesterol during the year prior to abdominal scan [mg/dL]                                      |
| latest_value_chol_total | Labs | Total Cholesterol: latest value                   | Latest available value of total cholesterol during the year prior to abdominal scan [mg/dL]                                                        |
| latest_value_gluc       | Labs | Serum glucose: latest value                       | Latest available value of serum glucose during the year prior to abdominal scan [mg/dL]                                                            |
| latest_value_hba1c      | Labs | HbA1c: latest value                               | Latest available value of hemoglobin A1c during the year prior to abdominal scan [%]                                                               |

|                            |        |                                                          |                                                                                                                         |
|----------------------------|--------|----------------------------------------------------------|-------------------------------------------------------------------------------------------------------------------------|
| latest_value_trig          | Labs   | Triglycerides: latest value                              | Latest available value of triglycerides during the year prior to abdominal scan [mg/dL]                                 |
| num_times_taken_chol_hdl   | Labs   | HDL Cholesterol: times measured                          | Number of times high density lipoprotein cholesterol was measured during the year prior to abdominal scan               |
| num_times_taken_chol_ldl   | Labs   | LDL Cholesterol: times measured                          | Number of times low density lipoprotein cholesterol was measured during the year prior to abdominal scan                |
| num_times_taken_chol_total | Labs   | Total Cholesterol: times measured                        | Number of times total cholesterol was measured during the year prior to abdominal scan                                  |
| num_times_taken_gluc       | Labs   | Serum glucose: times measured                            | Number of times serum glucose was measured during the year prior to abdominal scan                                      |
| num_times_taken_hba1c      | Labs   | HbA1c: times measured                                    | Number of times hemoglobin A1c was measured during the year prior to abdominal scan                                     |
| num_times_taken_trig       | Labs   | Triglycerides: times measured                            | Number of times triglycerides were measured during the year prior to abdominal scan                                     |
| bmi                        | Other  | Body Mass Index                                          | Latest available measurement or estimation of body mass index in the year prior to abdominal scan [kg/m <sup>2</sup> ]  |
| smoker                     | Other  | Smoker                                                   | Whether it was documented that the patient is a smoker in the year prior to abdominal scan                              |
| exp_wt_lab_diastolic       | Vitals | Diastolic blood pressure: exponentially weighted average | Exponentially weighted average of measurements diastolic blood pressure during the year prior to abdominal scan [mm Hg] |
| exp_wt_lab_hr              | Vitals | Heart rate: exponentially weighted average               | Exponentially weighted average of measurements heart rate during the year prior to abdominal scan [beats per minute]    |

|                              |        |                                                         |                                                                                                                             |
|------------------------------|--------|---------------------------------------------------------|-----------------------------------------------------------------------------------------------------------------------------|
| exp_wt_lab_resp              | Vitals | Respiratory rate: exponentially weighted average        | Exponentially weighted average of measurements respiratory rate during the year prior to abdominal scan [cycles per minute] |
| exp_wt_lab_spo2              | Vitals | SpO2: exponentially weighted average                    | Exponentially weighted average of measurements of oxygen saturation (SpO2) during the year prior to abdominal scan [%]      |
| exp_wt_lab_systolic          | Vitals | Systolic blood pressure: exponentially weighted average | Exponentially weighted average of measurements of systolic blood pressure during the year prior to abdominal scan [mm Hg]   |
| exp_wt_lab_temp_c            | Vitals | Temperature: exponentially weighted average             | Exponentially weighted average of measurements temperature during the year prior to abdominal scan [Celsius]                |
| latest_value_diastolic       | Vitals | Diastolic blood pressure: latest value                  | Latest available value of diastolic blood pressure during the year prior to abdominal scan [mm Hg]                          |
| latest_value_hr              | Vitals | Heart rate: latest value                                | Latest available value of heart rate during the year prior to abdominal scan [beats per minute]                             |
| latest_value_resp            | Vitals | Respiratory rate: latest value                          | Latest available value of respiratory rate during the year prior to abdominal scan [cycles per minute]                      |
| latest_value_spo2            | Vitals | SpO2: latest value                                      | Latest available value of oxygen saturation (SpO2) during the year prior to abdominal scan [%]                              |
| latest_value_systolic        | Vitals | Systolic blood pressure: latest value                   | Latest available value of systolic blood pressure during the year prior to abdominal scan [mm Hg]                           |
| latest_value_temp_c          | Vitals | Temperature: latest value                               | Latest available value of temperature during the year prior to abdominal scan [Celsius]                                     |
| num_times_measured_diastolic | Vitals | Diastolic blood pressure: times measured                | Number of times diastolic blood pressure was measured during the year prior to abdominal scan                               |

|                             |        |                                         |                                                                                               |
|-----------------------------|--------|-----------------------------------------|-----------------------------------------------------------------------------------------------|
| num_times_measured_hr       | Vitals | Heart rate: times measured              | Number of times heart rate was measured during the year prior to abdominal scan               |
| num_times_measured_resp     | Vitals | Respiratory rate: times measured        | Number of times respiratory rate was measured during the year prior to abdominal scan         |
| num_times_measured_spo2     | Vitals | SpO2: times measured                    | Number of times oxygen saturation (SpO2) was measured during the year prior to abdominal scan |
| num_times_measured_systolic | Vitals | Systolic blood pressure: times measured | Number of times systolic blood pressure was measured during the year prior to abdominal scan  |
| num_times_measured_temp_c   | Vitals | Temperature: times measured             | Number of times temperature was measured during the year prior to abdominal scan              |

---
