# Supplementary material for: Opportunistic Assessment of Ischemic Heart Disease Risk Using Abdominopelvic Computed Tomography and Medical Record Data: a Multimodal Explainable Artificial Intelligence Approach
Source: bioRxiv or medRxiv preprint supplement (doi:10.1101/2021.01.23.21250197), 2021-01-26
Supplement: Supplementary file [file media-3.pdf]

| Subpopulation                                                                      | Model                                | 1-year cohort        |                      | 5-year cohort        |                      |
|------------------------------------------------------------------------------------|--------------------------------------|----------------------|----------------------|----------------------|----------------------|
|                                                                                    |                                      | AUROC (95% CI)       | AUCPR (95% CI)       | AUROC (95% CI)       | AUCPR (95% CI)       |
| Complete PCE data (1y n=313, % IHD positive=4.5) / (5y n=72, % IHD positive=26.4)  | FRS                                  | .71 (.58-.82)        | .09 (.07-.17)        | .54 (.40-.65)        | .28 (.24-.39)        |
|                                                                                    | PCE                                  | <b>.75 (.61-.85)</b> | <b>.17 (.09-.37)</b> | .60 (.46-.70)        | .31 (.27-.43)        |
|                                                                                    | Segmentation only                    | .67 (.55-.76)        | .07 (.06-.11)        | .56 (.42-.69)        | .33 (.26-.50)        |
|                                                                                    | PCE+Segmentation                     | .73 (.58-.85)        | .12 (.08-.20)        | .56 (.42-.68)        | .31 (.26-.44)        |
|                                                                                    | Clinical only                        | .63 (.51-.76)        | .07 (.05-.14)        | .78 (.66-.87)        | .61 (.46-.79)        |
|                                                                                    | Imaging only                         | .69 (.59-.82)        | .09 (.06-.18)        | .71 (.58-.80)        | .51 (.37-.66)        |
|                                                                                    | Imaging+Clinical Fusion              | .67 (.57-.79)        | .08 (.06-.17)        | .79 (.67-.87)        | .62 (.49-.78)        |
|                                                                                    | Imaging+Clinical+Segmentation Fusion | .64 (.55-.77)        | .08 (.05-.17)        | <b>.81 (.69-.89)</b> | <b>.64 (.50-.81)</b> |
| Missing PCE data (1y n=1305, % IHD positive=4.4) / (5y n=282, % IHD positive=24.8) | FRS                                  | .72 (.67-.77)        | .09 (.07-.13)        | .76 (.70-.81)        | .49 (.41-.58)        |
|                                                                                    | PCE                                  | .75 (.71-.81)        | .12 (.10-.18)        | .77 (.72-.82)        | .48 (.41-.57)        |
|                                                                                    | Segmentation                         | .70 (.65-.75)        | .08 (.07-.11)        | .77 (.72-.82)        | .46 (.40-.56)        |
|                                                                                    | PCE+Segmentation                     | .77 (.73-.82)        | .12 (.09-.17)        | .79 (.74-.83)        | .48 (.41-.58)        |
|                                                                                    | Clinical only                        | <b>.80 (.76-.84)</b> | .16 (.12-.24)        | .86 (.81-.89)        | .67 (.60-.75)        |
|                                                                                    | Imaging only                         | .75 (.71-.80)        | .11 (.09-.16)        | .83 (.78-.87)        | .69 (.61-.77)        |
|                                                                                    | Imaging+Clinical Fusion              | .79 (.75-.84)        | <b>.17 (.12-.24)</b> | <b>.88 (.84-.91)</b> | <b>.73 (.66-.81)</b> |
|                                                                                    | Imaging+Clinical+Segmentation Fusion | .77 (.72-.82)        | <b>.17 (.12-.24)</b> | .87 (.83-.91)        | .72 (.65-.80)        |
| 40-75 y/o (1y n=1047, % IHD positive=4.5) / (5y n=241, % IHD positive=27.8)        | FRS                                  | .63 (.57-.69)        | .07 (.05-.09)        | .66 (.59-.72)        | .39 (.34-.47)        |
|                                                                                    | PCE                                  | .69 (.62-.75)        | .08 (.07-.11)        | .70 (.64-.76)        | .43 (.37-.52)        |
|                                                                                    | Segmentation                         | .67 (.61-.72)        | .07 (.06-.10)        | .68 (.62-.74)        | .40 (.35-.49)        |
|                                                                                    | PCE+Segmentation                     | .71 (.64-.76)        | .10 (.08-.15)        | .70 (.64-.76)        | .41 (.36-.50)        |
|                                                                                    | Clinical only                        | .70 (.64-.77)        | .11 (.08-.17)        | .84 (.79-.88)        | .68 (.60-.77)        |
|                                                                                    | Imaging only                         | .70 (.65-.77)        | .10 (.08-.17)        | .77 (.71-.82)        | .63 (.56-.72)        |
|                                                                                    | Imaging+Clinical Fusion              | <b>.73 (.68-.80)</b> | <b>.13 (.09-.20)</b> | <b>.86 (.82-.90)</b> | <b>.73 (.66-.81)</b> |
|                                                                                    | Imaging+Clinical+Segmentation Fusion | .70 (.64-.78)        | .12 (.09-.20)        | .85 (.81-.89)        | <b>.73 (.65-.81)</b> |
| Under 40 y/o (1y n=450, % IHD positive=1.1) / (5y n=81, % IHD positive=8.6)        | FRS                                  | .35 (.10-.38)        | .01 (.01-.02)        | .64 (.32-.83)        | .29 (.12-.61)        |
|                                                                                    | PCE                                  | .46 (.12-.64)        | .01 (.01-.02)        | .76 (.59-.86)        | .20 (.14-.43)        |
|                                                                                    | Segmentation                         | .65 (.33-.84)        | <b>.05 (.01-.19)</b> | .59 (.19-.84)        | .32 (.12-.61)        |
|                                                                                    | PCE+Segmentation                     | .56 (.23-.69)        | <b>.05 (.01-.22)</b> | .70 (.39-.90)        | .28 (.14-.60)        |
|                                                                                    | Clinical only                        | <b>.69 (.29-.94)</b> | <b>.05 (.02-.15)</b> | .76 (.44-.95)        | .40 (.20-.69)        |
|                                                                                    | Imaging only                         | <b>.69 (.41-.94)</b> | .03 (.02-.08)        | <b>.82 (.54-.97)</b> | .47 (.28-.84)        |

|                                                                              |                                      |                      |                      |                      |                      |
|------------------------------------------------------------------------------|--------------------------------------|----------------------|----------------------|----------------------|----------------------|
|                                                                              | Imaging+Clinical Fusion              | <b>.69 (.33-.94)</b> | .04 (.02-.10)        | .80 (.52-.97)        | .51 (.27-.81)        |
|                                                                              | Imaging+Clinical+Segmentation Fusion | .68 (.43-.90)        | .03 (.02-.07)        | .80 (.49-.98)        | <b>.55 (.31-.86)</b> |
|                                                                              | FRS                                  | .47 (.33-.56)        | .15 (.13-.22)        | .51 (.36-.70)        | .55 (.43-.73)        |
|                                                                              | PCE                                  | .51 (.35-.61)        | .19 (.14-.34)        | .36 (.22-.55)        | .40 (.36-.53)        |
| Over 75 y/o (1y n=121, % IHD positive=15.7) / (5y n=32, % IHD positive=46.9) | Segmentation                         | .43 (.30-.54)        | .15 (.13-.24)        | .64 (.45-.79)        | .65 (.52-.82)        |
|                                                                              | PCE+Segmentation                     | .54 (.39-.65)        | .19 (.15-.27)        | .49 (.30-.65)        | .49 (.40-.68)        |
|                                                                              | Clinical only                        | <b>.58 (.44-.68)</b> | <b>.22 (.17-.36)</b> | .61 (.42-.77)        | .66 (.52-.80)        |
|                                                                              | Imaging only                         | .50 (.38-.63)        | .17 (.14-.28)        | <b>.76 (.61-.89)</b> | <b>.78 (.66-.89)</b> |
|                                                                              | Imaging+Clinical Fusion              | .54 (.39-.65)        | .20 (.15-.33)        | .70 (.52-.84)        | .75 (.62-.88)        |
|                                                                              | Imaging+Clinical+Segmentation Fusion | .56 (.40-.67)        | <b>.22 (.16-.37)</b> | .67 (.49-.82)        | .72 (.59-.85)        |
|                                                                              | FRS                                  | .70 (.65-.77)        | .11 (.08-.17)        | .73 (.66-.81)        | .48 (.41-.60)        |
|                                                                              | PCE                                  | .74 (.69-.82)        | <b>.15 (.11-.24)</b> | .73 (.64-.80)        | .47 (.40-.60)        |
| Male (1y n=684, % IHD positive=5.4) / (5y n=125, % IHD positive=30.4)        | Segmentation                         | .69 (.62-.74)        | .09 (.08-.13)        | .71 (.62-.78)        | .46 (.39-.60)        |
|                                                                              | PCE+Segmentation                     | .73 (.67-.80)        | .12 (.09-.18)        | .74 (.65-.81)        | .49 (.41-.61)        |
|                                                                              | Clinical only                        | <b>.76 (.71-.81)</b> | .13 (.10-.21)        | .82 (.75-.88)        | .69 (.60-.80)        |
|                                                                              | Imaging only                         | .72 (.66-.78)        | .11 (.09-.18)        | .84 (.77-.90)        | .74 (.64-.83)        |
|                                                                              | Imaging+Clinical Fusion              | .75 (.70-.81)        | .14 (.10-.23)        | <b>.88 (.82-.93)</b> | <b>.76 (.67-.85)</b> |
|                                                                              | Imaging+Clinical+Segmentation Fusion | .72 (.67-.80)        | <b>.15 (.11-.24)</b> | <b>.88 (.82-.92)</b> | .75 (.66-.85)        |
|                                                                              | FRS                                  | .76 (.69-.82)        | .09 (.07-.15)        | .73 (.66-.79)        | .39 (.33-.50)        |
|                                                                              | PCE                                  | .75 (.67-.82)        | .11 (.08-.19)        | .73 (.67-.79)        | .38 (.32-.48)        |
| Female (1y n=934, % IHD positive=3.6) / (5y n=229, % IHD positive=22.3)      | Segmentation                         | .73 (.66-.79)        | .08 (.06-.12)        | .73 (.66-.79)        | .42 (.34-.53)        |
|                                                                              | PCE+Segmentation                     | <b>.78 (.70-.85)</b> | .12 (.09-.18)        | .74 (.68-.80)        | .40 (.33-.50)        |
|                                                                              | Clinical only                        | .75 (.67-.81)        | .12 (.08-.20)        | .84 (.78-.89)        | .62 (.53-.72)        |
|                                                                              | Imaging only                         | .75 (.68-.81)        | .10 (.07-.19)        | .78 (.71-.84)        | .57 (.48-.67)        |
|                                                                              | Imaging+Clinical Fusion              | .77 (.69-.83)        | <b>.13 (.09-.22)</b> | <b>.85 (.79-.90)</b> | .65 (.56-.75)        |
|                                                                              | Imaging+Clinical+Segmentation Fusion | .74 (.66-.81)        | .12 (.09-.21)        | .84 (.79-.89)        | <b>.66 (.57-.75)</b> |
|                                                                              | FRS                                  | .73 (.64-.81)        | .08 (.07-.14)        | .73 (.62-.86)        | .59 (.46-.75)        |
|                                                                              | PCE                                  | <b>.82 (.74-.89)</b> | .15 (.10-.34)        | <b>.78 (.66-.89)</b> | <b>.66 (.52-.81)</b> |
| Asian (1y n=257, % IHD positive=4.3) / (5y n=55, % IHD positive=32.7)        | Segmentation                         | .65 (.56-.74)        | .06 (.05-.10)        | .77 (.65-.89)        | .64 (.51-.81)        |
|                                                                              | PCE+Segmentation                     | .80 (.72-.87)        | .11 (.08-.19)        | .76 (.64-.88)        | .61 (.48-.78)        |
|                                                                              | Clinical only                        | .81 (.73-.88)        | .14 (.10-.29)        | .72 (.60-.84)        | .56 (.43-.74)        |
|                                                                              | Imaging only                         | .76 (.66-.85)        | .11 (.08-.21)        | .76 (.64-.90)        | .72 (.60-.85)        |

|                                                                                           |                                      |                       |                       |                         |                         |
|-------------------------------------------------------------------------------------------|--------------------------------------|-----------------------|-----------------------|-------------------------|-------------------------|
|                                                                                           | Imaging+Clinical Fusion              | .81 (.74-.88)         | .15 (.10-.35)         | .75 (.63-.88)           | <b>.66 (.53-.81)</b>    |
|                                                                                           | Imaging+Clinical+Segmentation Fusion | .81 (.74-.88)         | <b>.18 (.10-.38)</b>  | .74 (.63-.86)           | .62 (.48-.77)           |
|                                                                                           | FRS                                  | .92 (.88-.98)         | .23 (.15-.50)         | .77 (.25-1.00)          | .77 (.50-1.00)          |
|                                                                                           | PCE                                  | .83 (.75-.93)         | .12 (.09-.25)         | .73 (.36-1.00)          | .66 (.32-1.00)          |
| Non-Hispanic Black (1y n=64,<br>% IHD positive=3.1)/ (5y n=13,<br>% IHD positive=23.1)    | Segmentation                         | <b>.97 (.92-1.00)</b> | <b>.42 (.27-1.00)</b> | .73 (.36-1.00)          | .66 (.31-1.00)          |
|                                                                                           | PCE+Segmentation                     | .94 (.88-.98)         | .33 (.22-.67)         | .97 (.83-1.00)          | .92 (.73-1.00)          |
|                                                                                           | Clinical only                        | .76 (.53-.97)         | .14 (.06-.50)         | .93 (.75-1.00)          | .81 (.53-1.00)          |
|                                                                                           | Imaging only                         | .94 (.89-.98)         | .29 (.19-.67)         | .70 (.17-1.00)          | .65 (.29-1.00)          |
|                                                                                           | Imaging+Clinical Fusion              | .90 (.85-.97)         | .18 (.13-.40)         | .93 (.75-1.00)          | .87 (.67-1.00)          |
|                                                                                           | Imaging+Clinical+Segmentation Fusion | .83 (.74-.94)         | .12 (.09-.29)         | <b>1.00 (1.00-1.00)</b> | <b>1.00 (1.00-1.00)</b> |
|                                                                                           | FRS                                  | .74 (.61-.86)         | <b>.18 (.10-.37)</b>  | .83 (.74-.92)           | .68 (.55-.83)           |
|                                                                                           | PCE                                  | .71 (.58-.82)         | <b>.18 (.09-.38)</b>  | .87 (.79-.94)           | .67 (.55-.83)           |
| Hispanic (1y n=306, % IHD<br>positive=4.9)/ (5y n=79, % IHD<br>positive=27.8)             | Segmentation                         | .68 (.57-.79)         | .11 (.07-.23)         | .78 (.69-.86)           | .52 (.41-.67)           |
|                                                                                           | PCE+Segmentation                     | .77 (.68-.85)         | .14 (.10-.25)         | .83 (.75-.91)           | .61 (.49-.77)           |
|                                                                                           | Clinical only                        | <b>.77 (.70-.84)</b>  | .11 (.09-.19)         | <b>.90 (.80-.97)</b>    | <b>.83 (.72-.93)</b>    |
|                                                                                           | Imaging only                         | .71 (.60-.80)         | .11 (.07-.21)         | .78 (.69-.87)           | .56 (.44-.71)           |
|                                                                                           | Imaging+Clinical Fusion              | .73 (.64-.82)         | .13 (.08-.29)         | .89 (.81-.95)           | .80 (.69-.90)           |
|                                                                                           | Imaging+Clinical+Segmentation Fusion | .70 (.60-.80)         | .12 (.08-.28)         | .87 (.78-.95)           | .78 (.66-.89)           |
|                                                                                           | FRS                                  | .65 (.58-.73)         | .06 (.05-.08)         | .43 (.27-.61)           | .23 (.21-.35)           |
|                                                                                           | PCE                                  | <b>.81 (.66-.92)</b>  | .12 (.08-.26)         | .46 (.29-.63)           | .24 (.21-.37)           |
| Other (1y n=189, % IHD<br>positive=3.7) / (5y n=32, % IHD<br>positive=25.0)               | Segmentation                         | .60 (.46-.74)         | .05 (.04-.08)         | .69 (.53-.86)           | .42 (.31-.70)           |
|                                                                                           | PCE+Segmentation                     | .72 (.61-.82)         | .08 (.06-.13)         | .48 (.32-.64)           | .24 (.22-.36)           |
|                                                                                           | Clinical only                        | .77 (.63-.89)         | .12 (.07-.30)         | .64 (.41-.81)           | .53 (.33-.76)           |
|                                                                                           | Imaging only                         | .78 (.68-.88)         | .09 (.07-.18)         | <b>.90 (.74-1.00)</b>   | <b>.86 (.70-1.00)</b>   |
|                                                                                           | Imaging+Clinical Fusion              | <b>.81 (.69-.91)</b>  | .12 (.08-.25)         | .77 (.58-.90)           | .63 (.43-.84)           |
|                                                                                           | Imaging+Clinical+Segmentation Fusion | .80 (.62-.93)         | <b>.14 (.09-.29)</b>  | .75 (.54-.91)           | .65 (.45-.86)           |
|                                                                                           | FRS                                  | .69 (.64-.77)         | .10 (.07-.18)         | .70 (.62-.76)           | .32 (.27-.42)           |
| Non-Hispanic White (1y n=802,<br>% IHD positive=4.5) / (5y<br>n=175, % IHD positive=21.7) | PCE                                  | .75 (.70-.83)         | .13 (.09-.22)         | .70 (.62-.77)           | .34 (.29-.45)           |
|                                                                                           | Segmentation                         | .72 (.66-.78)         | .09 (.07-.13)         | .68 (.59-.75)           | .35 (.29-.47)           |
|                                                                                           | PCE+Segmentation                     | .75 (.69-.83)         | .15 (.11-.24)         | .72 (.64-.79)           | .36 (.31-.49)           |
|                                                                                           | Clinical only                        | .75 (.69-.83)         | .18 (.11-.29)         | .85 (.79-.90)           | .62 (.51-.73)           |

|                                                                                                              |                                      |                      |                      |                      |                      |
|--------------------------------------------------------------------------------------------------------------|--------------------------------------|----------------------|----------------------|----------------------|----------------------|
|                                                                                                              | Imaging only                         | .73 (.66-.80)        | .14 (.09-.23)        | .85 (.79-.90)        | .65 (.55-.76)        |
|                                                                                                              | Imaging+Clinical Fusion              | <b>.77 (.70-.84)</b> | <b>.19 (.13-.31)</b> | <b>.90 (.85-.93)</b> | .69 (.59-.80)        |
|                                                                                                              | Imaging+Clinical+Segmentation Fusion | .73 (.65-.81)        | <b>.19 (.12-.31)</b> | <b>.90 (.85-.94)</b> | <b>.72 (.63-.83)</b> |
|                                                                                                              | FRS                                  | .72 (.65-.79)        | .14 (.12-.20)        | .69 (.60-.77)        | .50 (.43-.62)        |
| Taking lipid modifying agents<br>(1y n=375, % IHD positive=7.7)<br>/ (5y n=105, % IHD<br>positive=37.1)      | PCE                                  | .72 (.66-.80)        | .17 (.13-.26)        | .70 (.62-.78)        | .50 (.43-.61)        |
|                                                                                                              | Segmentation                         | .65 (.59-.72)        | .11 (.09-.17)        | .66 (.57-.75)        | .53 (.44-.65)        |
|                                                                                                              | PCE+Segmentation                     | <b>.76 (.68-.82)</b> | .18 (.14-.24)        | .71 (.63-.79)        | .50 (.44-.63)        |
|                                                                                                              | Clinical only                        | .73 (.64-.80)        | .19 (.14-.30)        | .85 (.78-.91)        | .79 (.71-.88)        |
|                                                                                                              | Imaging only                         | .71 (.63-.80)        | .16 (.12-.25)        | .83 (.75-.90)        | .79 (.71-.86)        |
|                                                                                                              | Imaging+Clinical Fusion              | <b>.76 (.68-.83)</b> | <b>.22 (.16-.35)</b> | .88 (.81-.93)        | .83 (.76-.91)        |
|                                                                                                              | Imaging+Clinical+Segmentation Fusion | .74 (.64-.82)        | <b>.22 (.16-.35)</b> | <b>.89 (.82-.94)</b> | <b>.86 (.79-.92)</b> |
|                                                                                                              | FRS                                  | .67 (.61-.74)        | .06 (.05-.11)        | .69 (.62-.75)        | .31 (.27-.40)        |
| Not taking lipid modifying<br>agents (1y n=1243, % IHD<br>positive=3.4) / (5y n=249, %<br>IHD positive=20.1) | PCE                                  | .73 (.68-.81)        | <b>.10 (.07-.18)</b> | .72 (.65-.77)        | .33 (.29-.43)        |
|                                                                                                              | Segmentation                         | .69 (.62-.75)        | .06 (.05-.09)        | .73 (.66-.79)        | .37 (.31-.48)        |
|                                                                                                              | PCE+Segmentation                     | .73 (.67-.79)        | .08 (.06-.11)        | .73 (.66-.78)        | .36 (.29-.45)        |
|                                                                                                              | Clinical only                        | .75 (.70-.81)        | .08 (.07-.12)        | .83 (.77-.87)        | .51 (.42-.62)        |
|                                                                                                              | Imaging only                         | .74 (.70-.80)        | .08 (.06-.14)        | .78 (.71-.83)        | .51 (.42-.62)        |
|                                                                                                              | Imaging+Clinical Fusion              | <b>.76 (.71-.81)</b> | .09 (.07-.13)        | <b>.85 (.79-.89)</b> | <b>.54 (.46-.66)</b> |
|                                                                                                              | Imaging+Clinical+Segmentation Fusion | .72 (.67-.79)        | .08 (.06-.13)        | .84 (.79-.88)        | .53 (.44-.65)        |
